# Supplementary material
Source: Royal Society of Chemistry journal article supplement (doi:10.1039/d6ce00256k)
Supplement: d6ce00256k1.pdf [file d6ce00256k1.pdf]

## Supporting Information

### Chiral blue box host-guest encapsulation induced CPL from achiral planar fluorescence dyes

Qing Yang,<sup>a</sup> Jingya Li,<sup>b</sup> Yanni He,<sup>c</sup> Ting Gao,<sup>a</sup> Yanyan Zhou<sup>\*a</sup> and Hongfeng Li<sup>\*a</sup>

*a* Key Laboratory of Functional Inorganic Material Chemistry, Ministry of Education, Heilongjiang University, 74, Xuefu Road, Harbin 150080.

*b* China State Key Laboratory of Baiyunobo Rare Earth Resource Researches and Comprehensive Utilization Institution, Baotou, 014030, China.

*c* Hwa Chong International School, 269783 Singapore.

E-mail: [lihongfeng1@hlju.edu.cn](mailto:lihongfeng1@hlju.edu.cn); [zhouyanyan@hlju.edu.cn](mailto:zhouyanyan@hlju.edu.cn); [gaotingmail@sina.cn](mailto:gaotingmail@sina.cn); [jingya1100@163.com](mailto:jingya1100@163.com)

### Table of contents

|                                                                                                            |           |
|------------------------------------------------------------------------------------------------------------|-----------|
| <b>1. Experimental section</b> .....                                                                       | <b>3</b>  |
| 1.1 Methods .....                                                                                          | 3         |
| 1.2 The synthetic routes of binaphthol unit and the characterization of corresponding intermediates. ....  | 4         |
| 1.2.2 Characterization of the corresponding intermediates. ....                                            | 5         |
| 1.3 The synthetic routes of chiral cyclophanes and the characterization of corresponding intermediates.... | 10        |
| 1.3.1 Characterization of the corresponding intermediates. ....                                            | 10        |
| 1.4 Synthesis and Characterization of achiral fluorescent dyes.....                                        | 13        |
| 1.4.1 Characterization of the corresponding intermediates .....                                            | 13        |
| <b>2. Photophysical properties of Binbox</b> .....                                                         | <b>15</b> |
| 2.1 UV-vis and CD spectra of host-guest combination .....                                                  | 15        |
| 2.2 Fluorescence spectra of host-guest combination .....                                                   | 18        |
| 2.3 Time-correlated single photon counting decay profiles.....                                             | 21        |
| 2.4 The screenshots of the luminescence quantum yield.....                                                 | 24        |
| 2.5 PL and CPL spectra of host-guest combination .....                                                     | 26        |
| <b>3. Host-guest complexation studies</b> .....                                                            | <b>28</b> |
| 3.1 G1@Binbox properties and exchange constants determination .....                                        | 29        |
| 3.2 G2@Binbox properties and exchange constants determination .....                                        | 30        |
| 3.5 G3@Binbox properties and exchange constants determination .....                                        | 31        |
| 3.4 G4@Binbox properties and exchange constants determination .....                                        | 33        |
| 3.3 G5@Binbox properties and exchange constants determination .....                                        | 34        |
| <b>4. DFT and Hirshfeld</b> .....                                                                          | <b>35</b> |
| 4.1 Calculation Details .....                                                                              | 35        |
| <b>5. Crystallographic Characterization</b> .....                                                          | <b>37</b> |
| <b>2. References</b> .....                                                                                 | <b>39</b> |



# 1. Experimental section

## 1.1 Methods

### **<sup>1</sup>H NMR and ESI-TOF-MS**

The <sup>1</sup>H NMR spectra were recorded on a Bruker AVANCE III 400 MHz spectrometer. <sup>1</sup>H NMR chemical shifts are in ppm relative to tetramethylsilane (TMS): CDCl<sub>3</sub> (7.26 ppm for <sup>1</sup>H).

High-resolution electrospray ionization mass spectrometry (ESI-TOF-MS) were recorded by using a Bruker maXis mass spectrometer. Data analysis was conducted with the Mass-Lynx Data Analysis software (Version 4.1) and simulations were performed with the MassLynx Isotope Pattern software.

### **Optical Measurements**

UV-Vis spectra were recorded at room temperature in different concentrations of CH<sub>3</sub>OH solutions in 10 mm light path quartz cuvettes on a PerkinElmer Lambda 25 spectrometer.

Excitation and emission spectra were recorded using an Edinburgh FLS 980 fluorescence spectrometer equipped with a red-sensitive photomultiplier detector (Hamamatsu R928). Excitation spectra were measured in CH<sub>3</sub>OH solutions ( $c = 2.5 \times 10^{-5}$  M) with quartz cuvettes of 10 mm path length. Emission spectra were measured in different concentrations of CH<sub>3</sub>OH solutions with quartz cuvettes of 10 mm path length.

Luminescence lifetimes were recorded on a single photon counting spectrometer from Edinburgh Instruments (FLS 980) with a microsecond pulse lamp as the excitation source.

### **Chiroptical measurements**

CD and CPL experiments were performed on an Olis DM245 spectrometer at room temperature. All samples were dissolved in different concentrations of Methanol or CH<sub>3</sub>CN solutions, and quartz cuvettes with optical pathway of 10 mm were employed. CD spectra were recorded in the range of 280–450 nm and in increments of 1 nm, and a slit width of 2 mm for the excitation was utilized. CPL spectra were recorded with a 375 nm laser as light source. The emission of left- and right-handed polarized light were collected in the range of 400–700 nm with the integration time of 1 s and the emission slit width of 0.6 mm.

1.2 The synthetic routes of binaphthol unit and the characterization of corresponding intermediates.

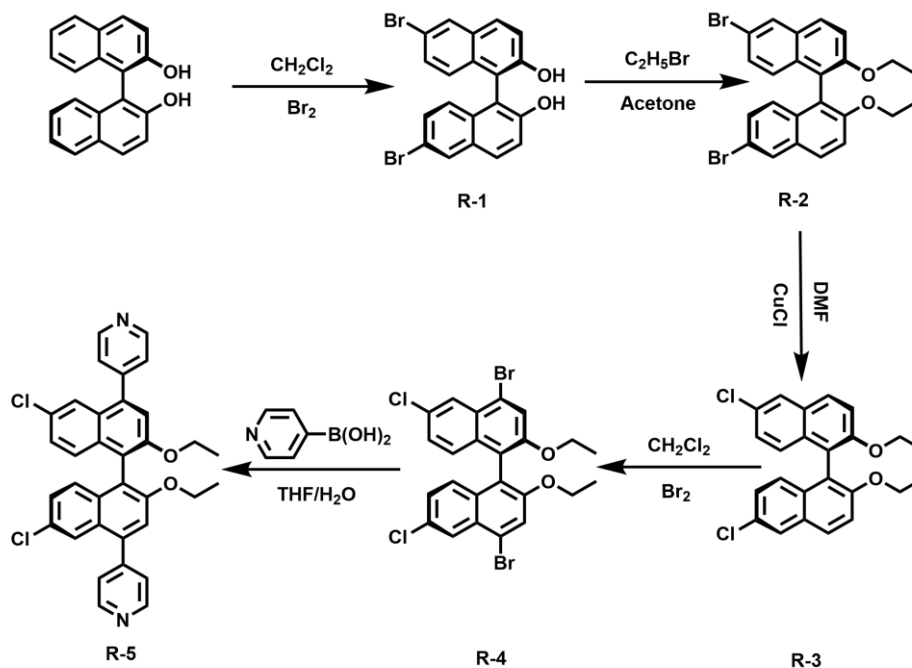

Scheme S1. Synthetic route of R-5.

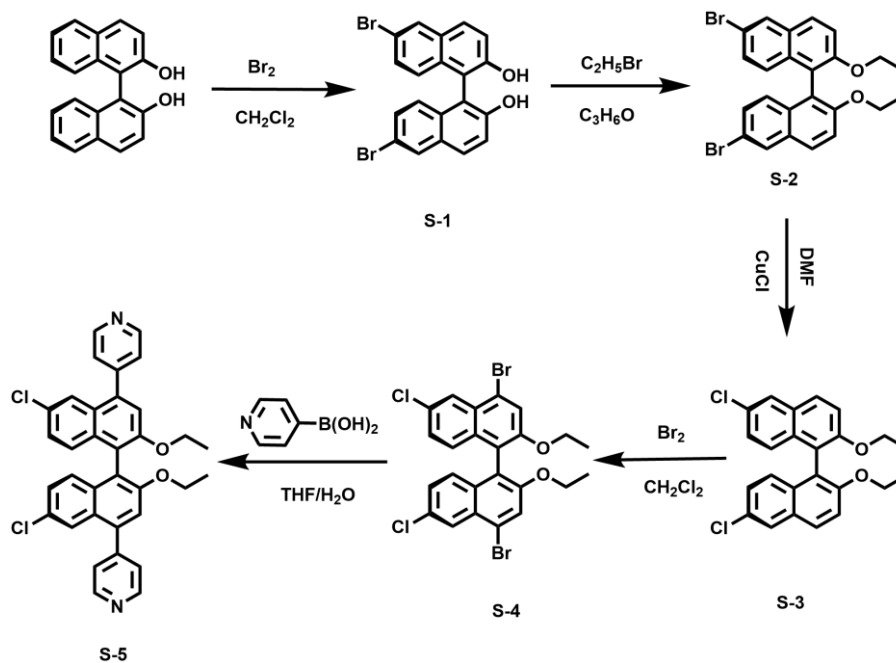

Scheme S2. Synthetic route of S-5.

## 1.2.2 Characterization of the corresponding intermediates.

### 1.2.2.1 (R)-6,6'-Dibromo-1,1'-binaphthalene-2,2'-diol (R-1)

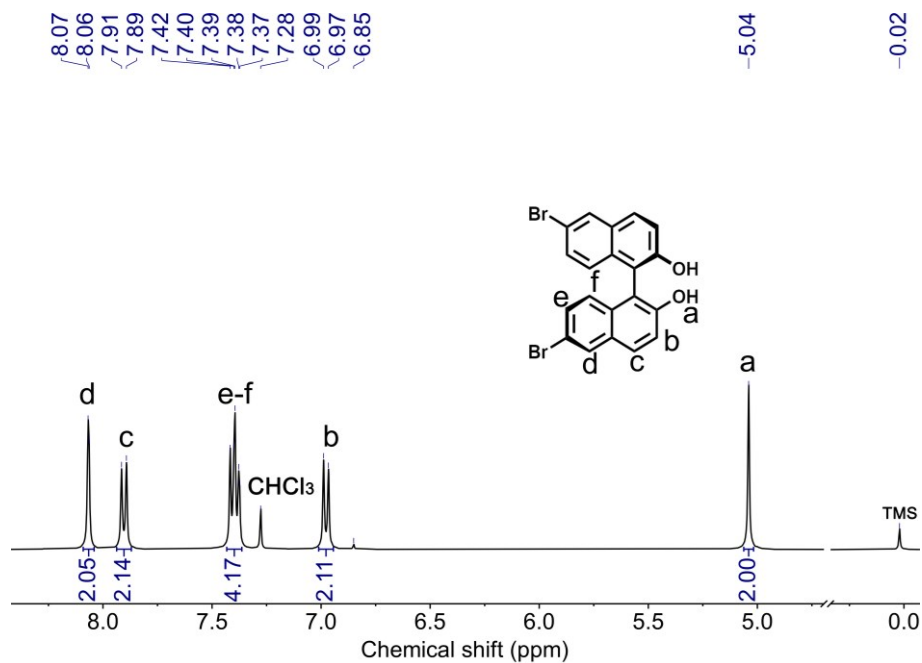

Fig. S1. <sup>1</sup>H NMR spectrum (400 MHz, 298 K, CDCl<sub>3</sub>) of R-1.

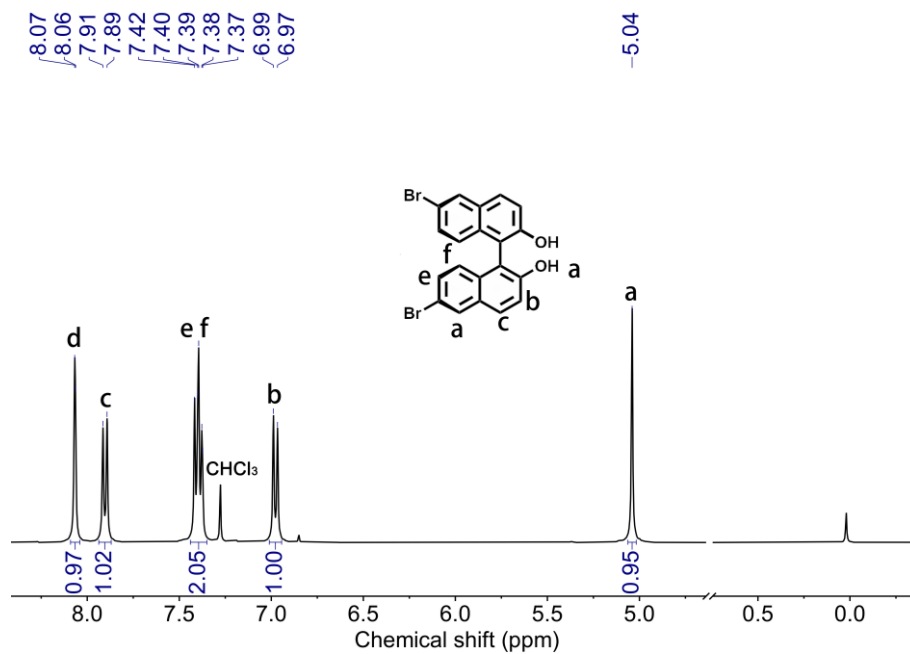

Fig. S2. <sup>1</sup>H NMR spectrum (400 MHz, 298 K, CDCl<sub>3</sub>) of S-1.

### 1.2.2.2 (R)-6,6'-dibromo-2,2'-diethoxy-1,1'-binaphthalene (R-2)

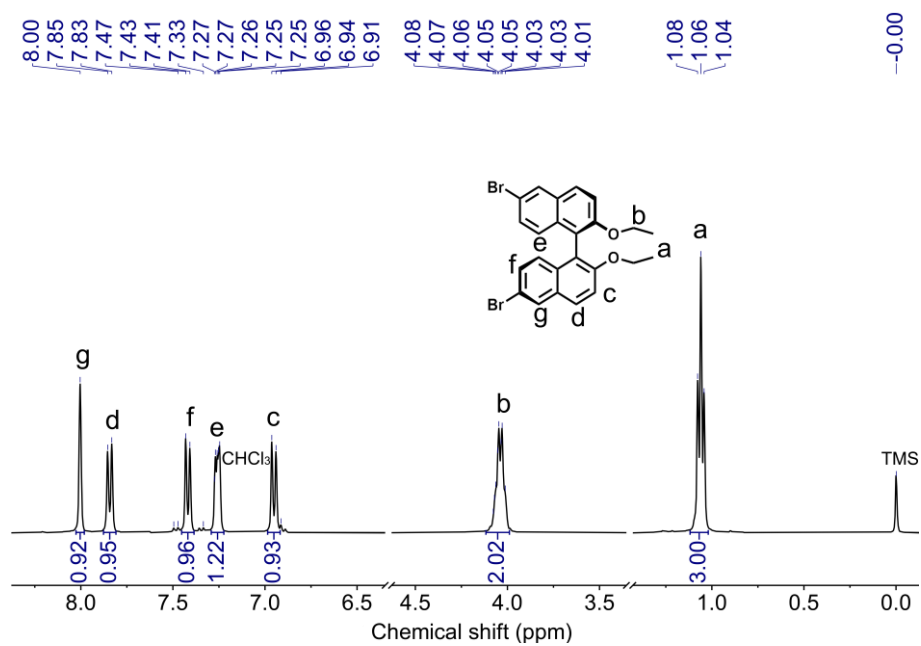

Fig. S3. <sup>1</sup>H NMR spectrum (400 MHz, 298 K, CDCl<sub>3</sub>) of R-2.

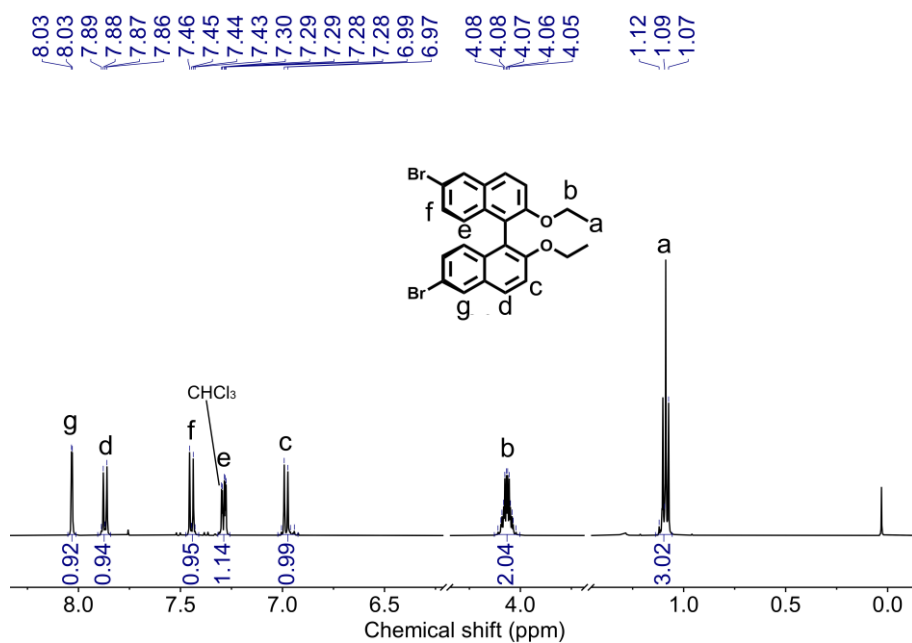

Fig. S4. <sup>1</sup>H NMR spectrum (400 MHz, 298 K, CDCl<sub>3</sub>) of S-2.

### 1.2.1.3 (R)-6,6'-dichloro-2,2'-diethoxy-1,1'-binaphthalene (R-3)

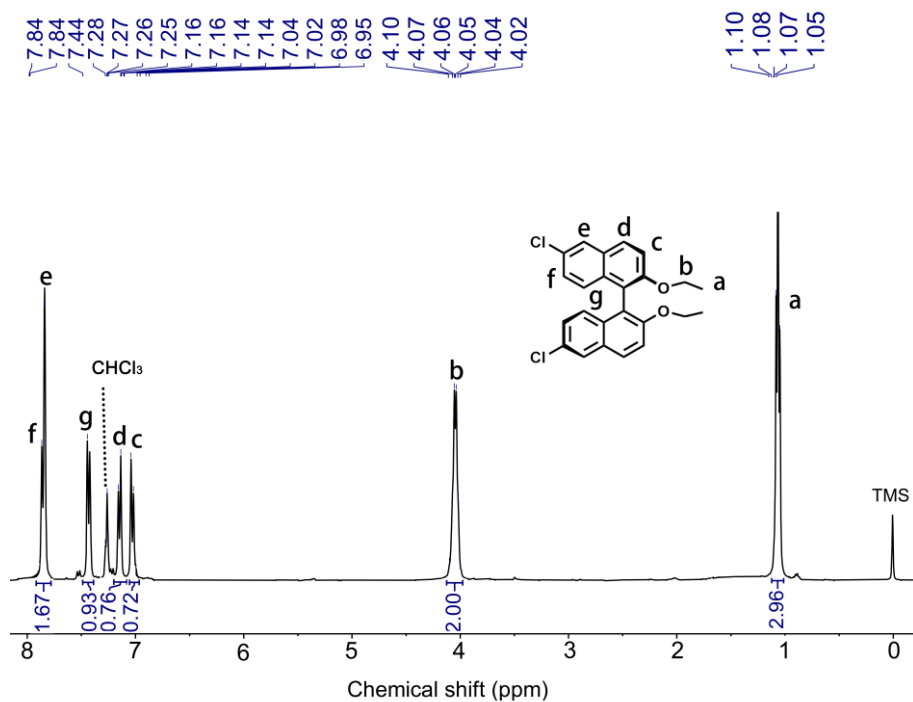

Fig. S5.  $^1\text{H}$  NMR spectrum (400 MHz, 298 K,  $\text{CDCl}_3$ ) of R-3.

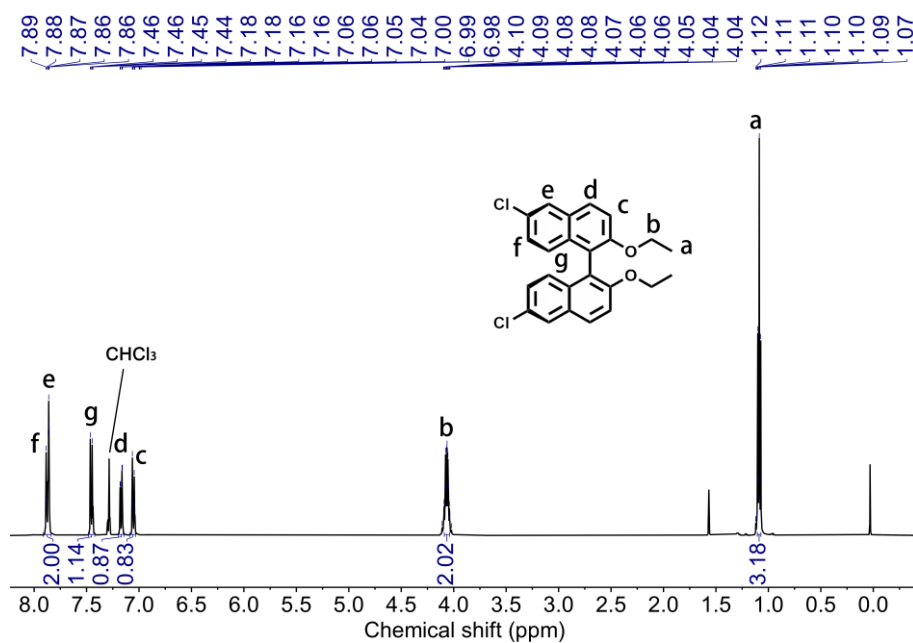

Fig. S6.  $^1\text{H}$  NMR spectrum (400 MHz, 298 K,  $\text{CDCl}_3$ ) of S-3.

1.2.2.4 (R)-4,4'-dibromo-6,6'-dichloro-2,2'-diethoxy-1,1'-binaphthalene (R-4)

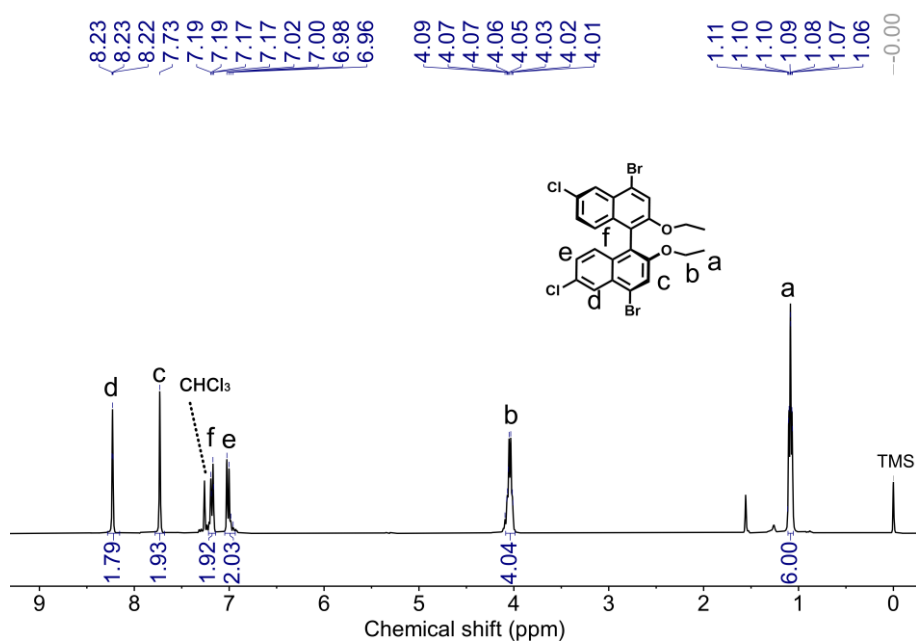

Fig. S7. <sup>1</sup>H NMR spectrum (400 MHz, 298 K, CDCl<sub>3</sub>) of R-4.

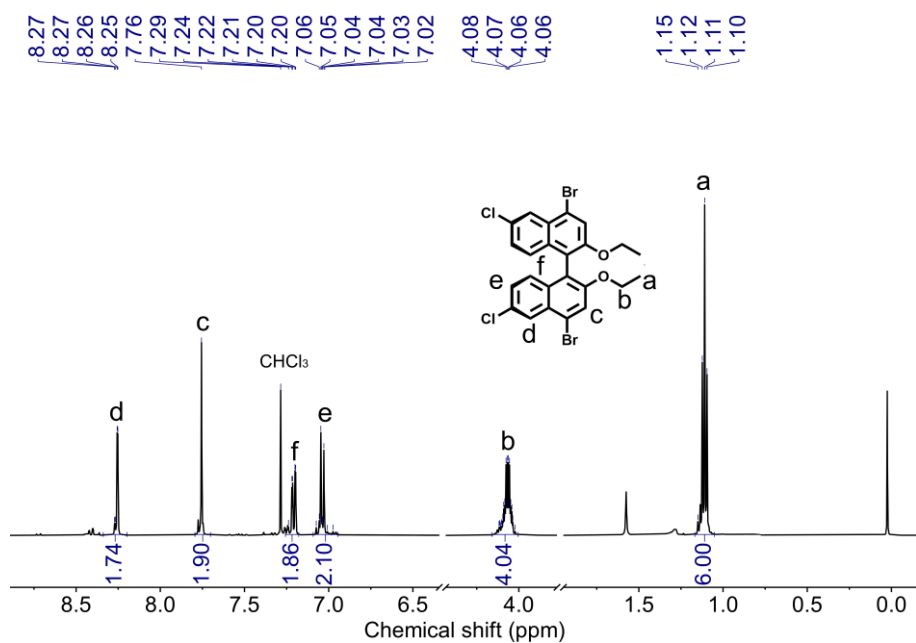

Fig. S8. <sup>1</sup>H NMR spectrum (400 MHz, 298 K, CDCl<sub>3</sub>) of S-4.

1.2.2.5 (R-5)-4,4'-(6,6'-dichloro-2,2'-diethoxy-[1,1'-binaphthalene]-4,4'-diyl)dipyridine

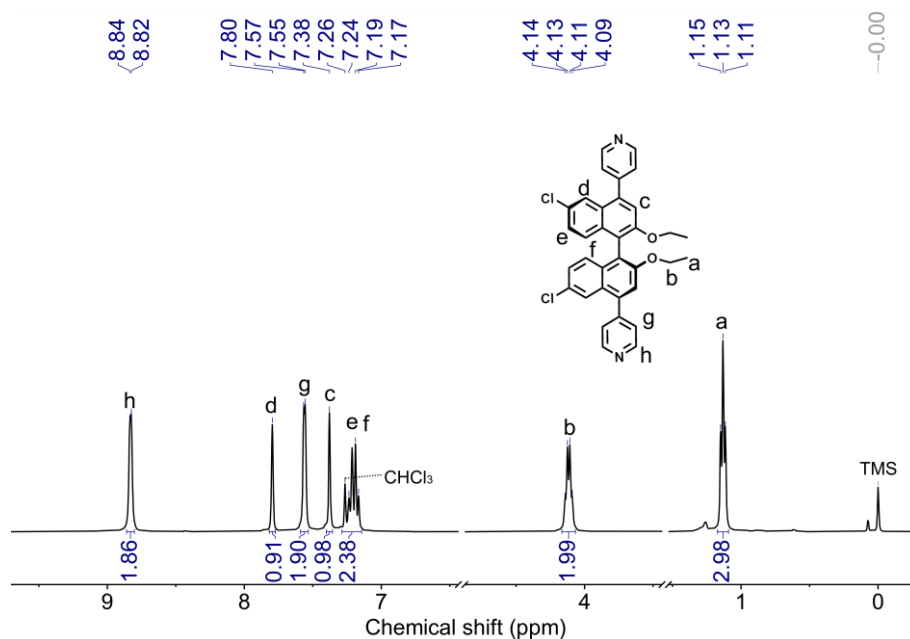

Fig. S9. <sup>1</sup>H NMR spectrum (400 MHz, 298 K, CDCl<sub>3</sub>) of R-5.

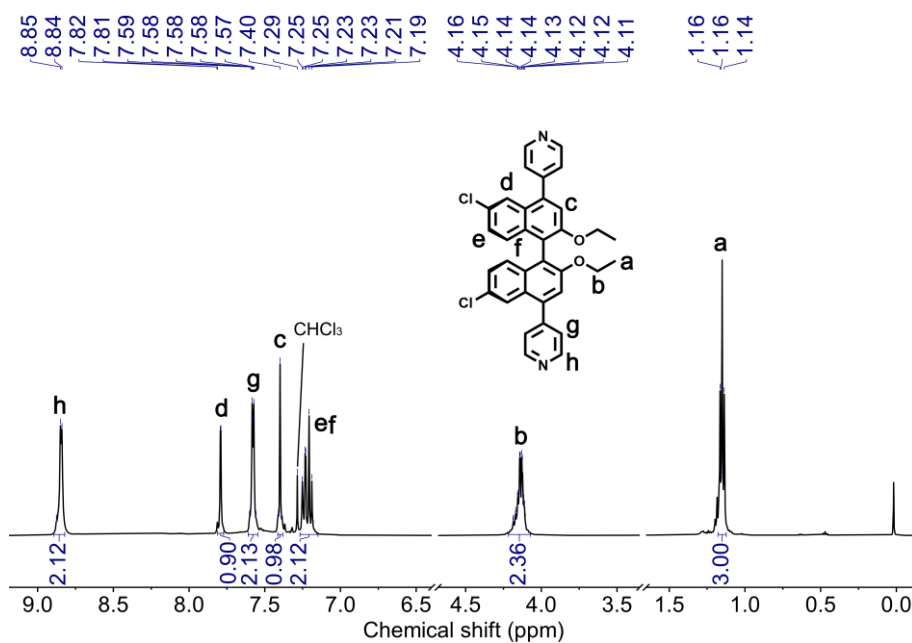

Fig. S10. <sup>1</sup>H NMR spectrum (400 MHz, 298 K, CDCl<sub>3</sub>) of S-5.

### 1.3 The synthetic routes of chiral cyclophanes and the characterization of corresponding intermediates.

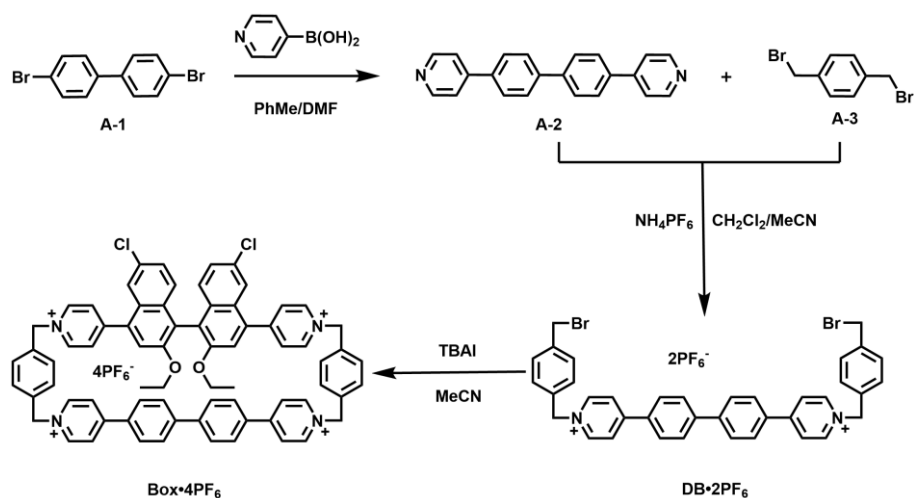

**Scheme S3.** Synthetic route of Binbox.

#### 1.3.1 Characterization of the corresponding intermediates.

##### 1.3.1.1 4,4'-(4,4'-Biphenylene)bipyridine (A-2)

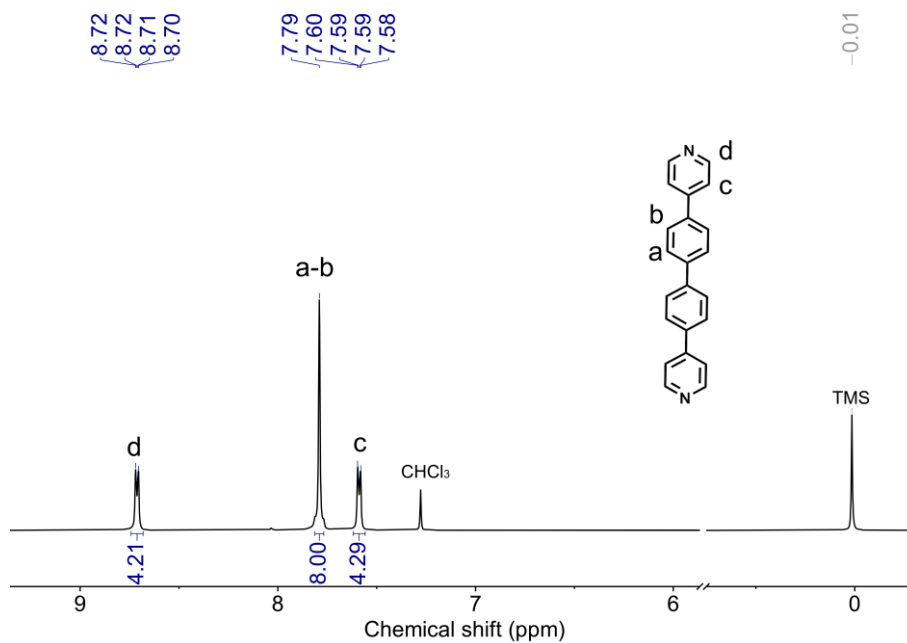

**Fig. S11.**  $^1\text{H}$  NMR spectrum (400 MHz, 298 K,  $\text{CDCl}_3$ ) of A-2.

1.3.1.2 Bis(4-bromomethylbenzyl)(4,4'-(4,4'-biphenylene)bipyridin-1-ium)bis(hexafluoro-phosphate) (DB•2 PF<sub>6</sub>)

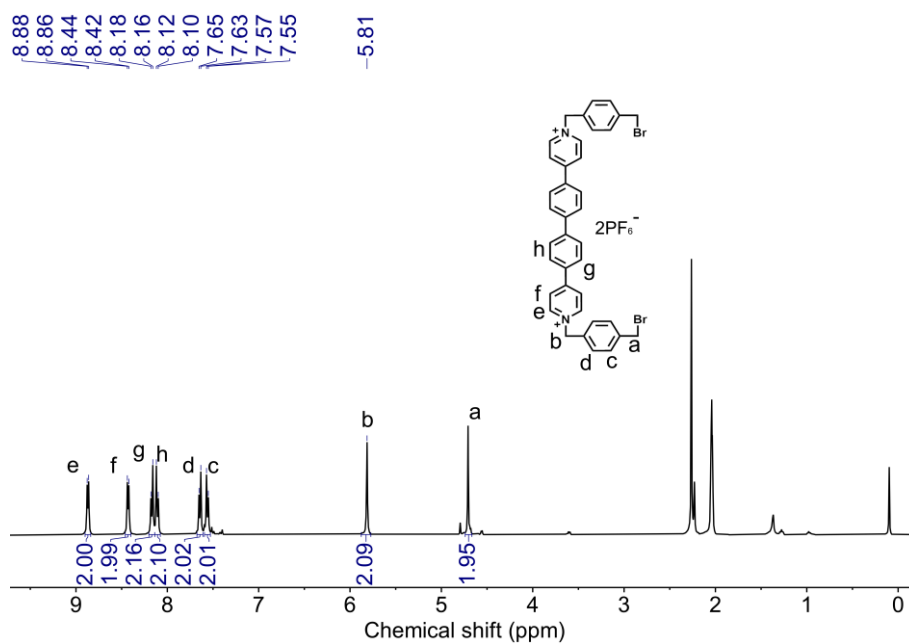

Fig. S12. <sup>1</sup>H NMR spectrum (400 MHz, 298 K, CD<sub>3</sub>CN) of DB•2PF<sub>6</sub>.

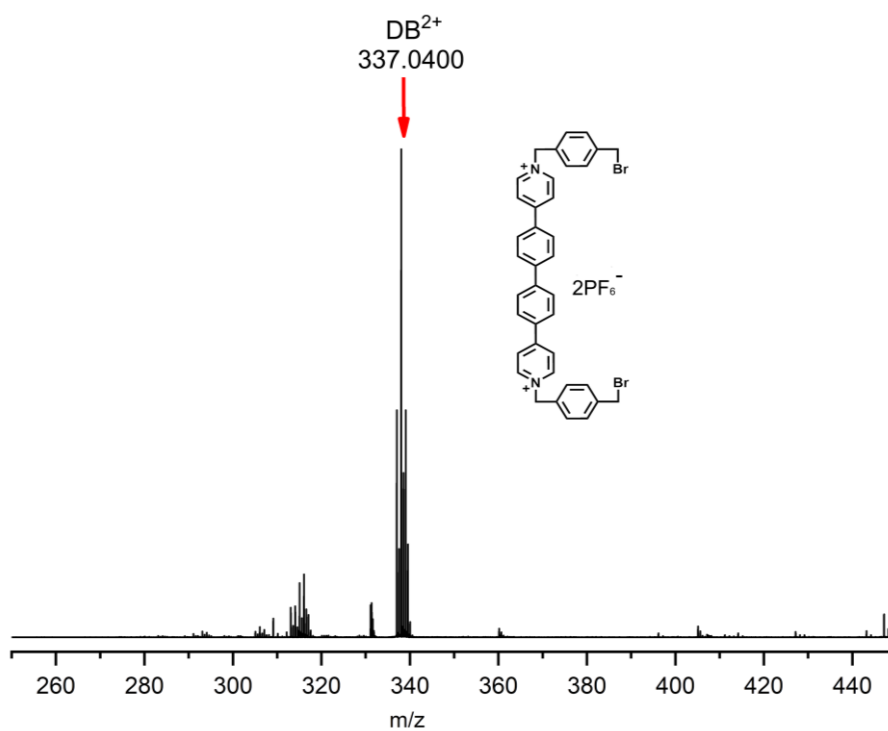

Fig. S13. ESI-TOF-MS spectrum of DB•2PF<sub>6</sub>.

### 1.3.1.3 Binbox

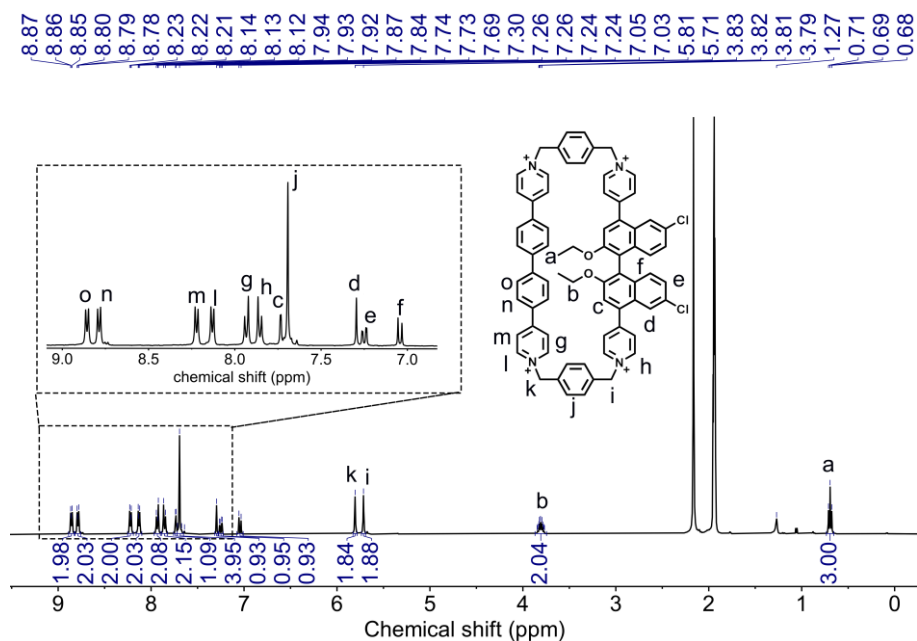

Fig. S14.  $^1\text{H}$  NMR spectrum (400 MHz, 298 K,  $\text{CD}_3\text{CN}$ ) of R-Binbox.

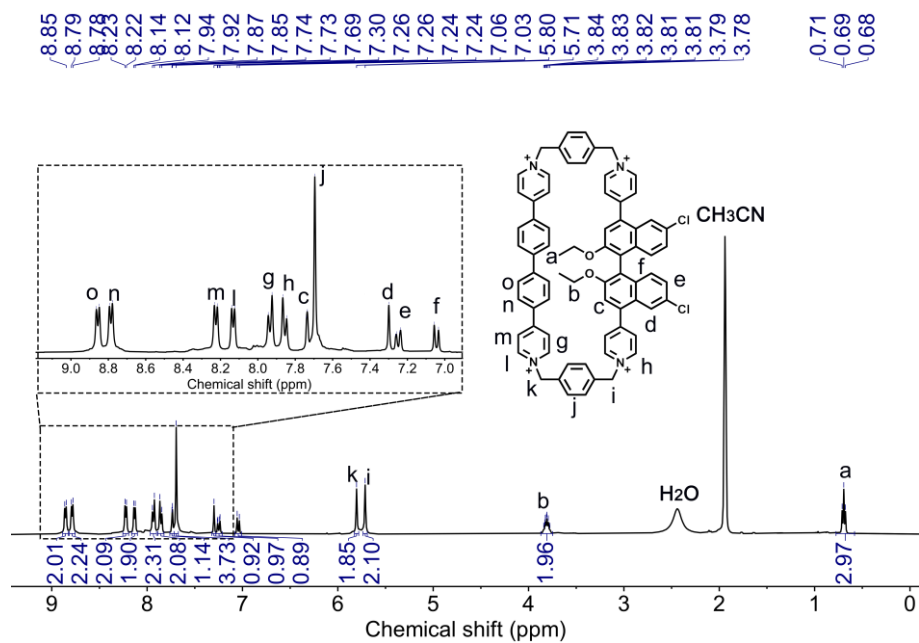

Fig. S15.  $^1\text{H}$  NMR spectrum (400 MHz, 298 K,  $\text{CD}_3\text{CN}$ ) of S-Binbox.

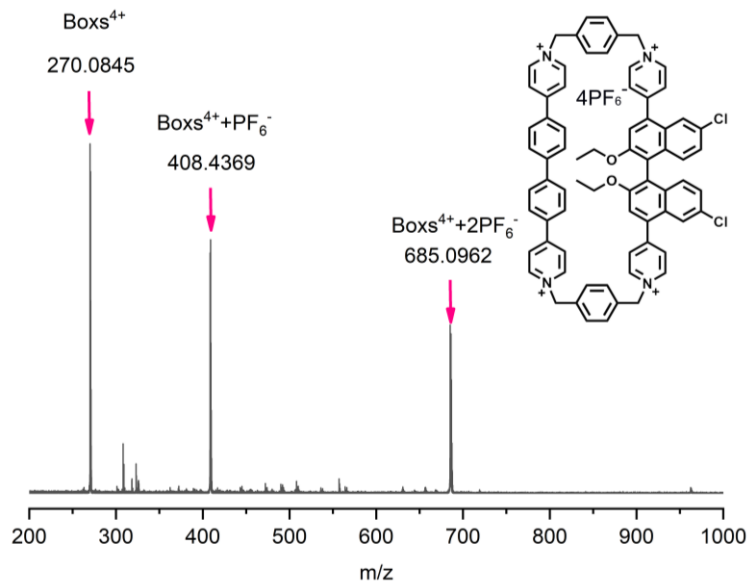

Fig. S16. ESI-TOF-MS spectrum of Binbox.

## 1.4 Synthesis and Characterization of achiral fluorescent dyes

### 1.4.1 Characterization of the corresponding intermediates

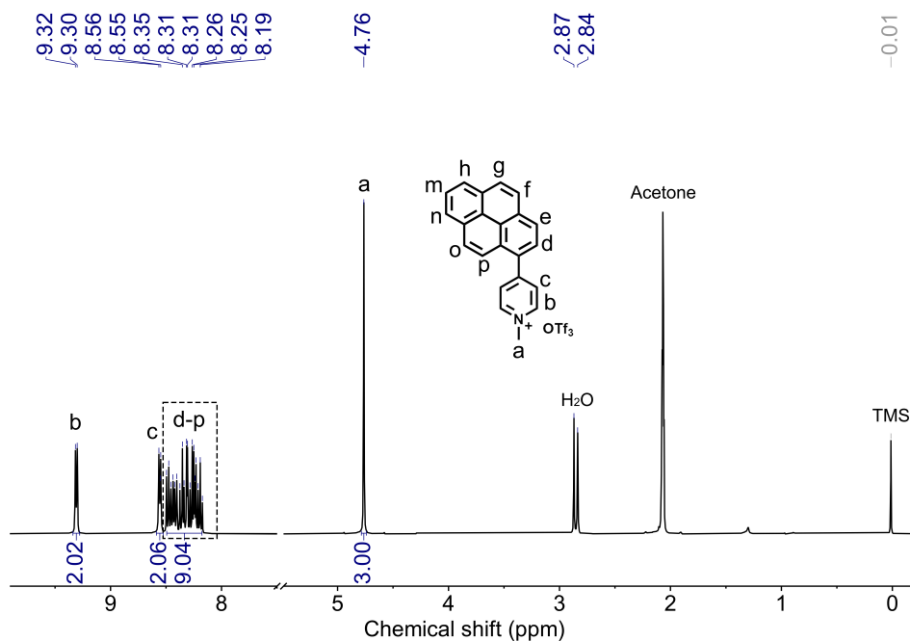

Fig. S17. <sup>1</sup>H NMR spectrum (400 MHz, 298 K, Acetone) of G1.

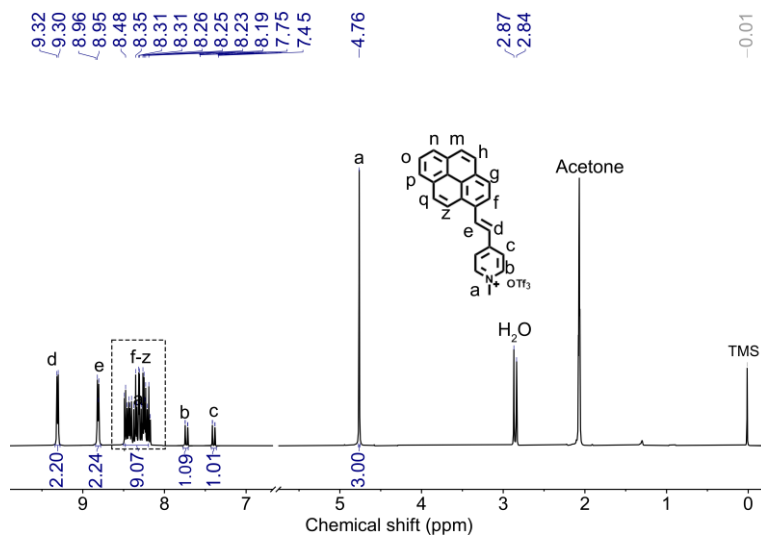

**Fig. S18.** <sup>1</sup>H NMR spectrum (400 MHz, 298 K, Acetone) of G2.

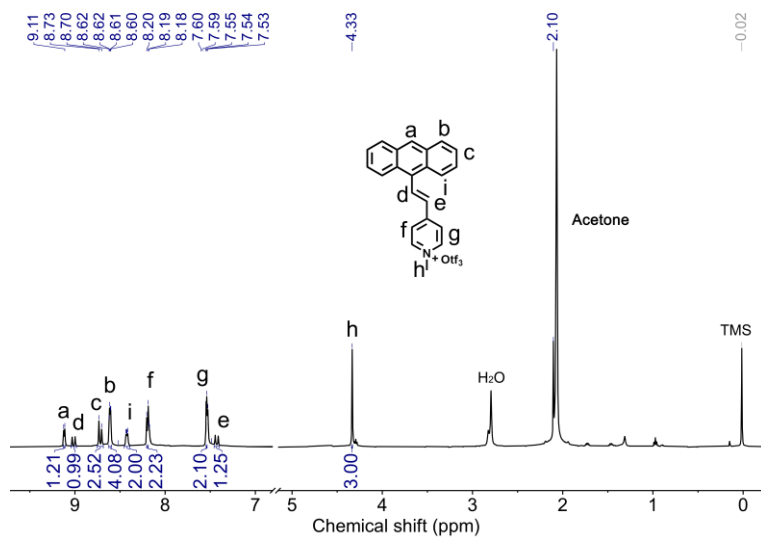

**Fig. S19.** <sup>1</sup>H NMR spectrum (400 MHz, 298 K, Acetone) of G3.

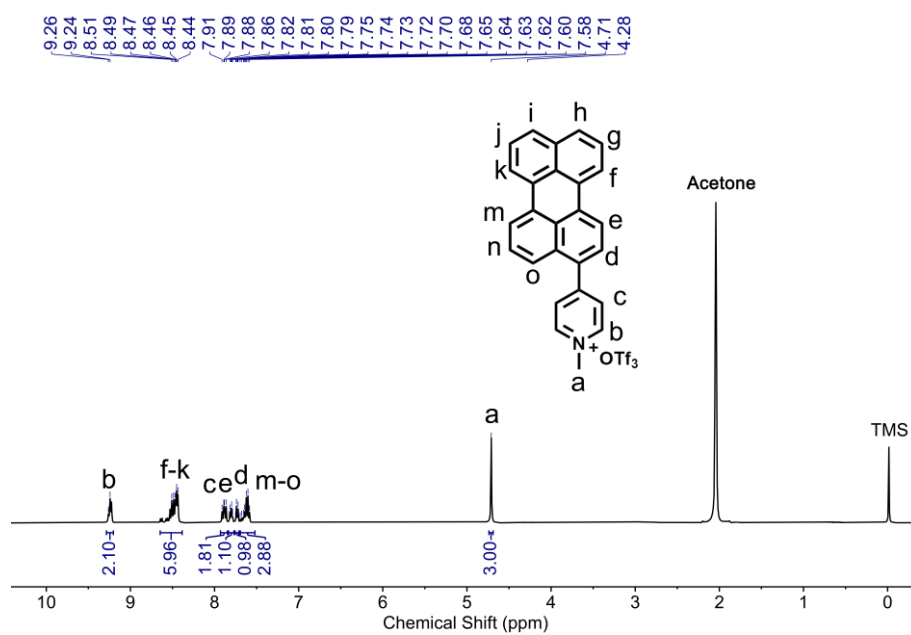

**Fig. S20.** <sup>1</sup>H NMR spectrum (400 MHz, 298 K, Acetone) of G4.

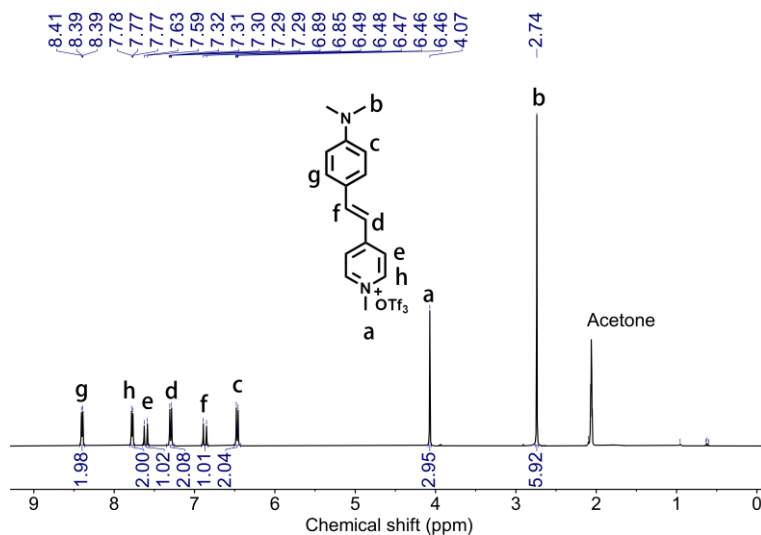

**Fig. S21.**  $^1\text{H}$  NMR spectrum (400 MHz, 298 K, Acetone) of G5.

## 2. Photophysical properties of Binbox

### 2.1 UV-vis and CD spectra of host-guest combination

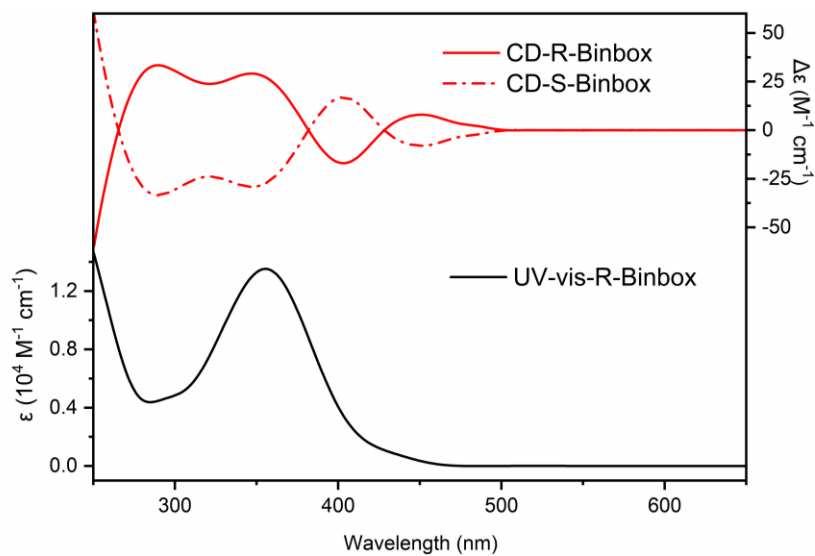

**Fig. S22.** UV-vis and CD spectra of the Binbox in  $\text{CH}_3\text{OH}$  ( $c = 1.0 \times 10^{-5} \text{ M}$ ).

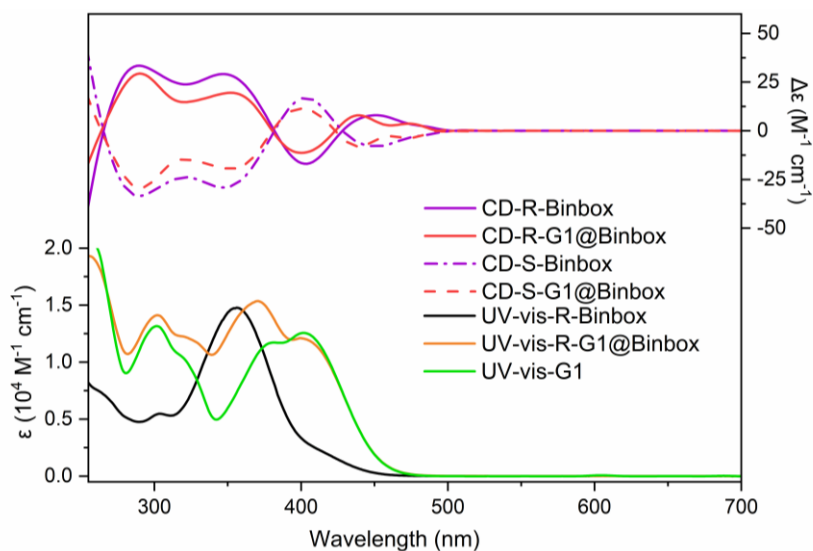

**Fig. S23.** UV-vis and CD spectra of the G1@Binbox in CH<sub>3</sub>OH ( $c = 1.0 \times 10^{-5}$  M).

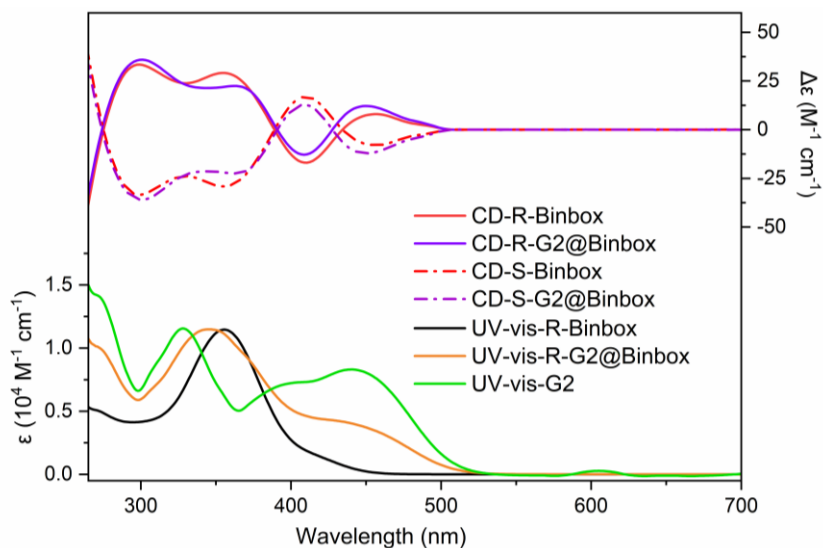

**Fig. S24.** UV-vis and CD spectra of the G2@Binbox in CH<sub>3</sub>OH ( $c = 1.0 \times 10^{-5}$  M).

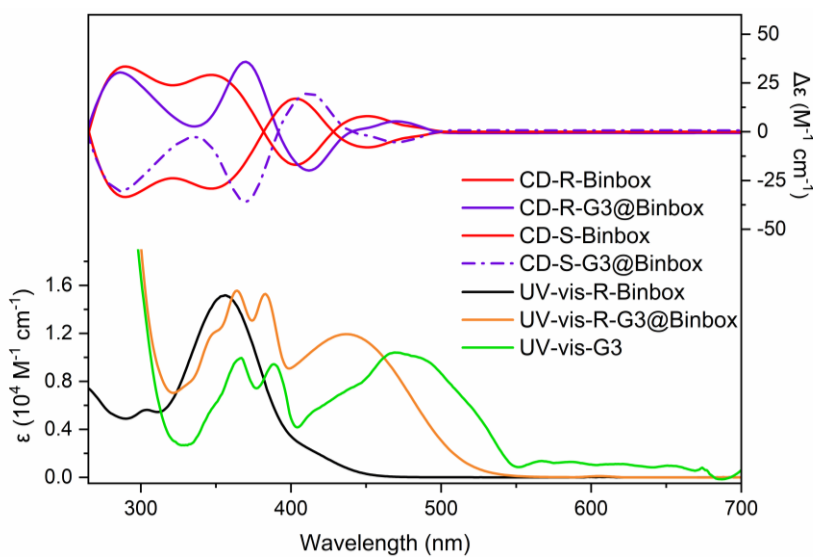

**Fig. S25.** UV-vis and CD spectra of the G3@Binbox in CH<sub>3</sub>OH ( $c = 1.0 \times 10^{-5}$  M).

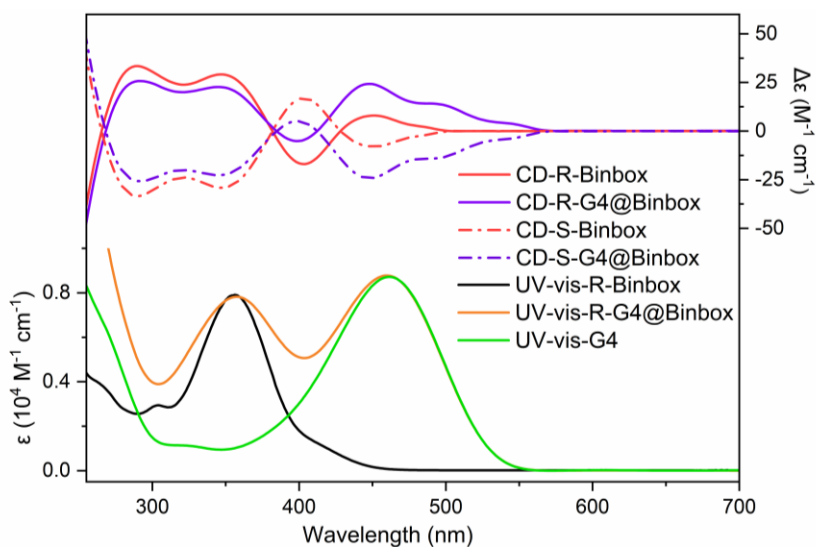

**Fig. S26.** UV-vis and CD spectra of the G4@Binbox in CH<sub>3</sub>OH ( $c = 1.0 \times 10^{-5} \text{ M}$ ).

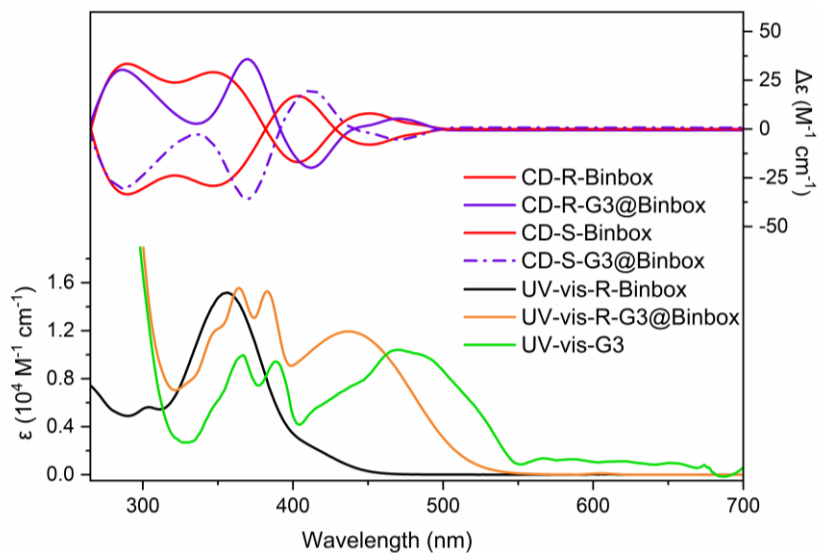

**Fig. S27.** UV-vis and CD spectra of the G5@Binbox in CH<sub>3</sub>OH ( $c = 1.0 \times 10^{-5} \text{ M}$ ).

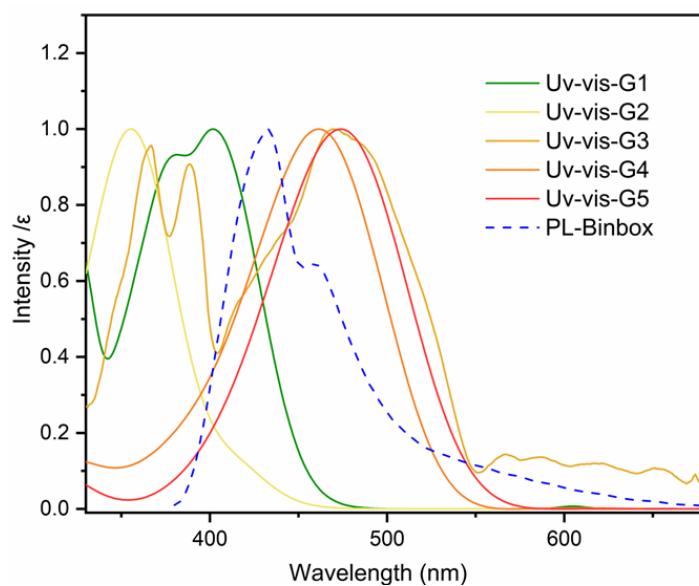

**Fig. S28.** UV-vis and CD spectra of the G1-G5 in CH<sub>3</sub>OH ( $c = 1.0 \times 10^{-5} \text{ M}$ ) and emission spectral of G1 to the

solution of Binbox in CH<sub>3</sub>OH ( $c = 1.0 \times 10^{-5}$  M).

## 2.2 Fluorescence spectra of host-guest combination

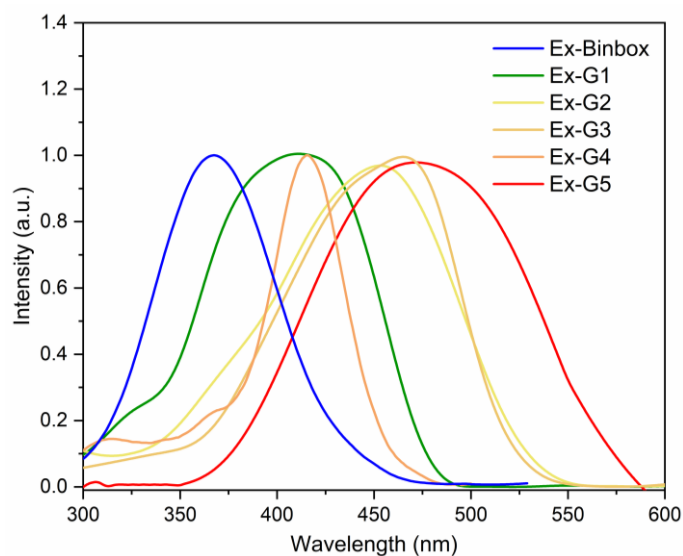

**Fig. S29.** Excitation and emission spectra of Binbox and G1-G5 in CH<sub>3</sub>OH ( $c = 1.0 \times 10^{-5}$  M).

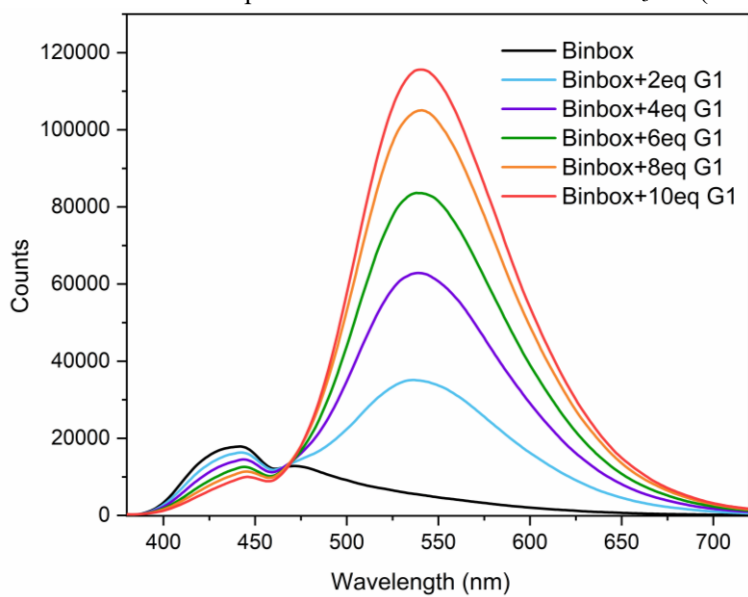

**Fig. S30.** Changes in emission spectral upon adding various equivalents of G1 to the solution of Binbox in CH<sub>3</sub>OH ( $c = 1.0 \times 10^{-5}$  M).

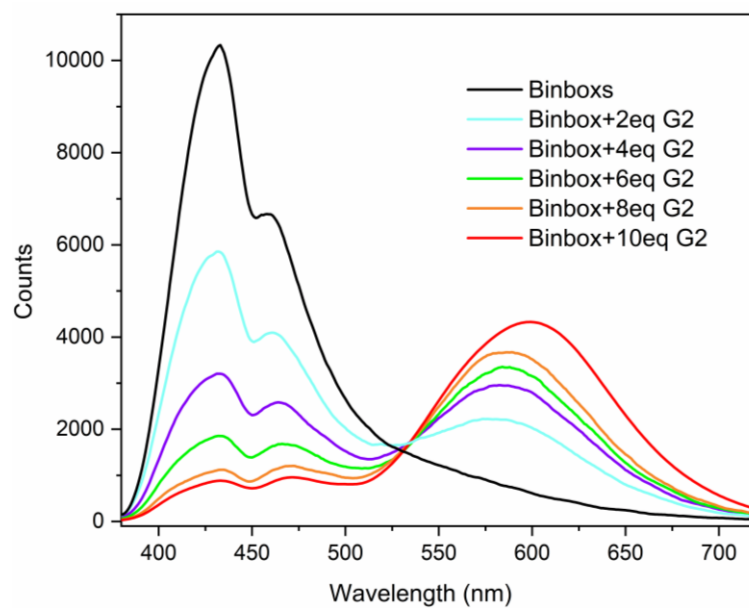

**Fig. S31.** Changes in emission spectral upon adding various equivalents of G2 to the solution of Binbox in CH<sub>3</sub>OH (c = 1.0 × 10<sup>-5</sup> M).

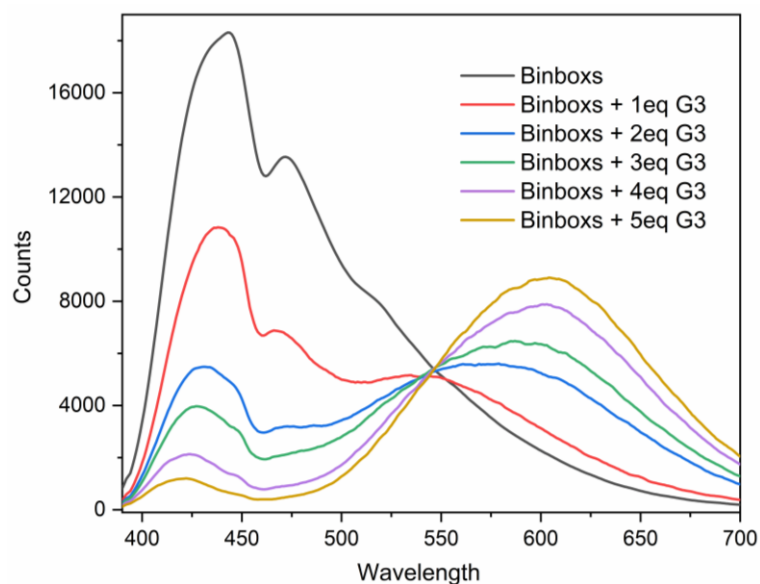

**Fig. S32.** Changes in emission spectral upon adding various equivalents of G3 to the solution of Binbox in CH<sub>3</sub>OH (c = 1.0 × 10<sup>-5</sup> M).

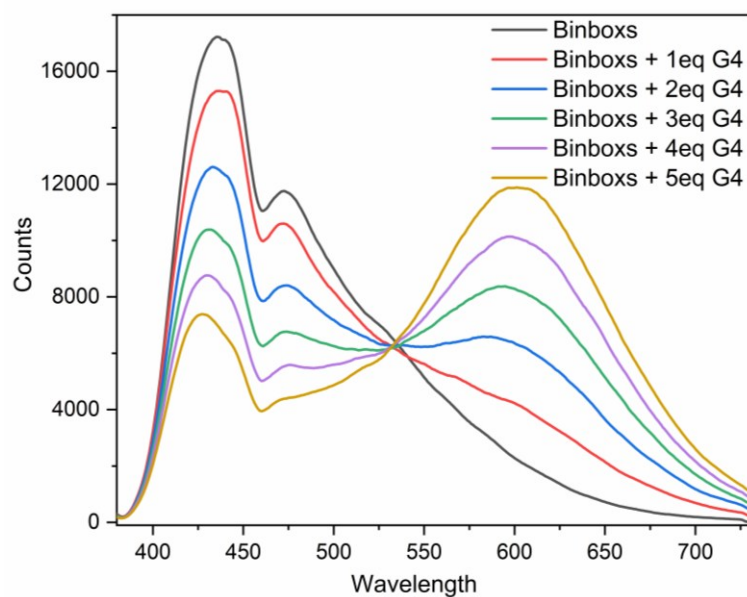

**Fig. S33.** Changes in emission spectral upon adding various equivalents of G1 to the solution of Binbox in CH<sub>3</sub>OH ( $c = 1.0 \times 10^{-5}$  M).

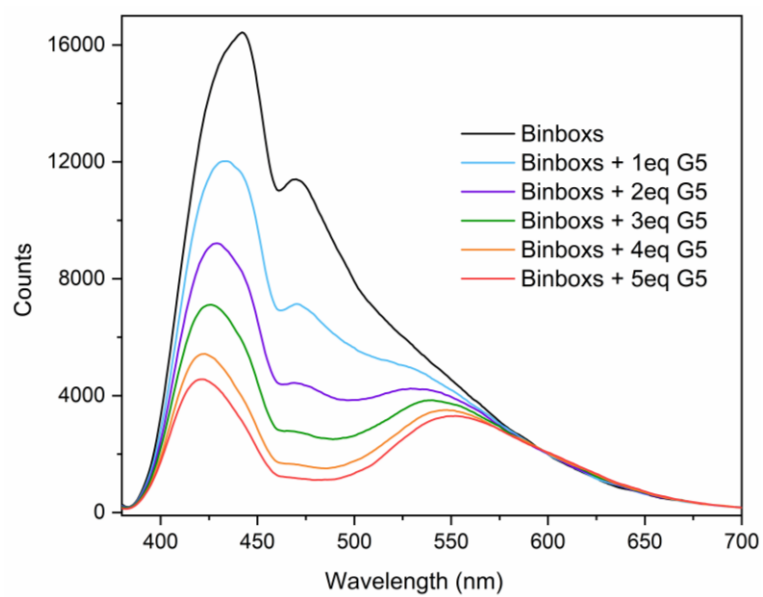

**Fig. S34.** Changes in emission spectral upon adding various equivalents of G1 to the solution of Binbox in CH<sub>3</sub>OH ( $c = 1.0 \times 10^{-5}$  M).

### 2.3 Time-correlated single photon counting decay profiles

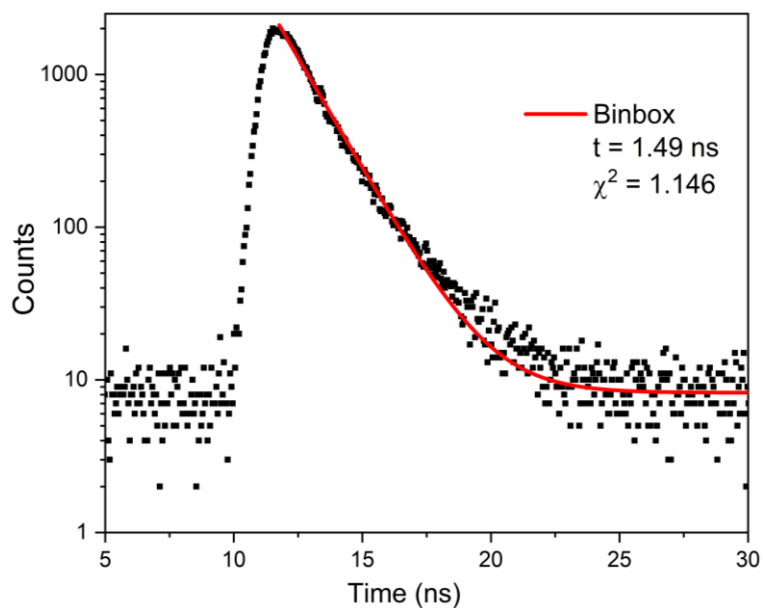

Fig. S35. Luminescence decay curves of Binbox in  $\text{CH}_3\text{OH}$  ( $c = 1.0 \times 10^{-5} \text{ M}$ ).

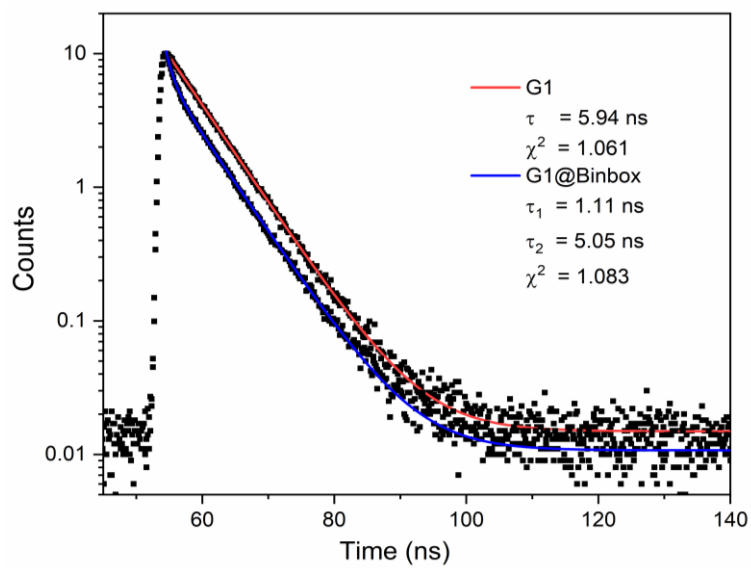

Fig. S36. Luminescence decay curves of G1@Binbox in  $\text{CH}_3\text{OH}$  ( $c = 1.0 \times 10^{-5} \text{ M}$ ).

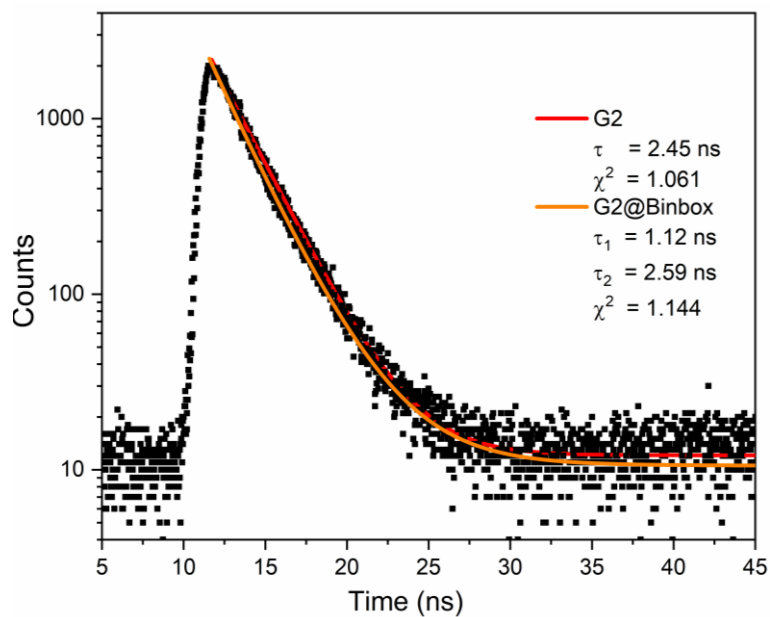

**Fig. S37.** Luminescence decay curves of G2@Binbox in CH<sub>3</sub>OH ( $c = 1.0 \times 10^{-5}$  M).

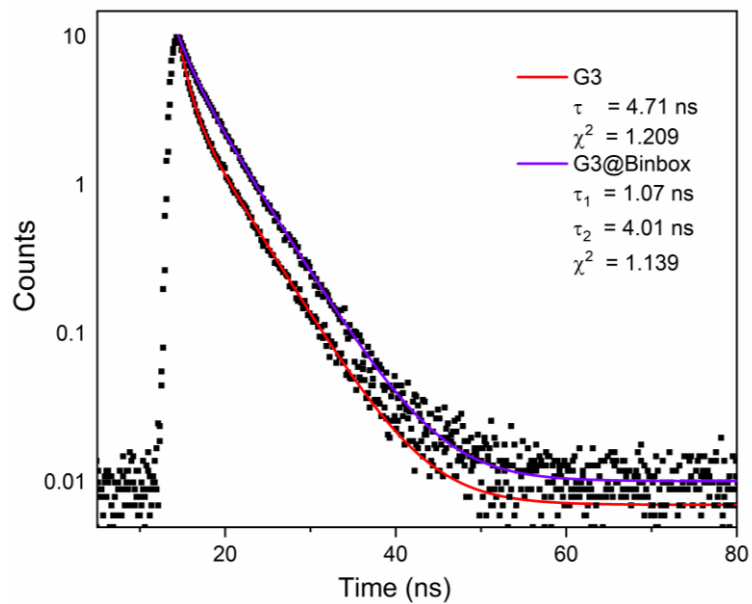

**Fig. S38.** Luminescence decay curves of G3@Binbox in CH<sub>3</sub>OH ( $c = 1.0 \times 10^{-5}$  M).

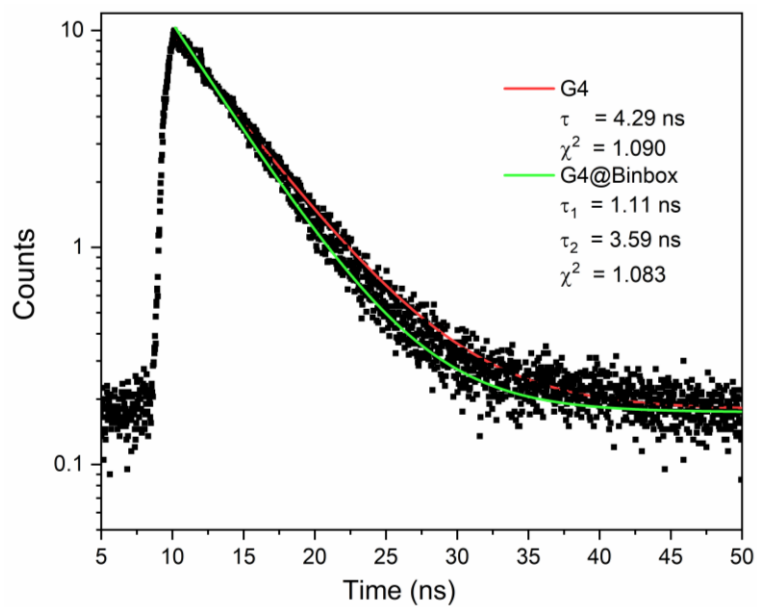

**Fig. S39.** Luminescence decay curves of G4@Binbox in CH<sub>3</sub>OH ( $c = 1.0 \times 10^{-5}$  M).

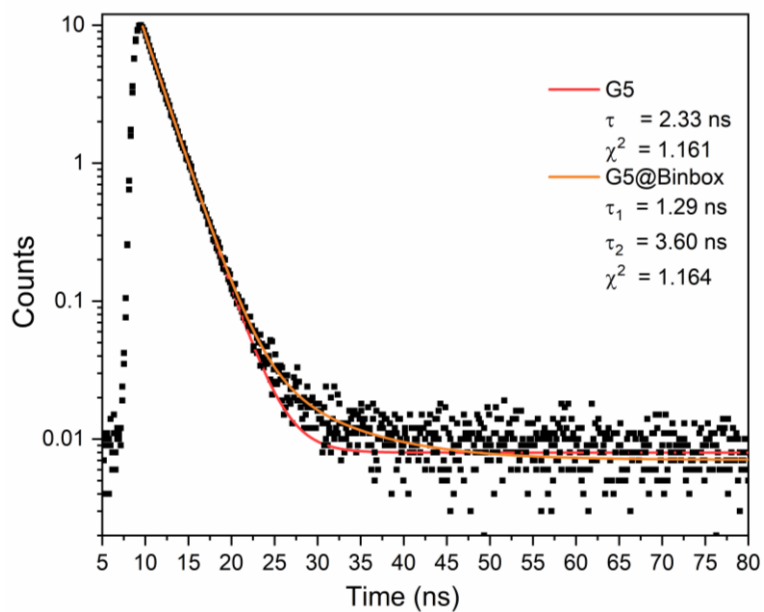

**Fig. S40.** Luminescence decay curves of G5@Binbox in CH<sub>3</sub>OH ( $c = 1.0 \times 10^{-5}$  M).

## 2.4 The screenshots of the luminescence quantum yield

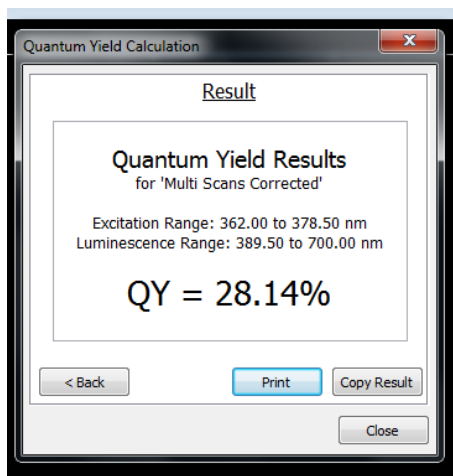

**Fig. S41.** The screenshot of the luminescence quantum yield of Binbox in CH<sub>3</sub>OH measured with integration sphere.

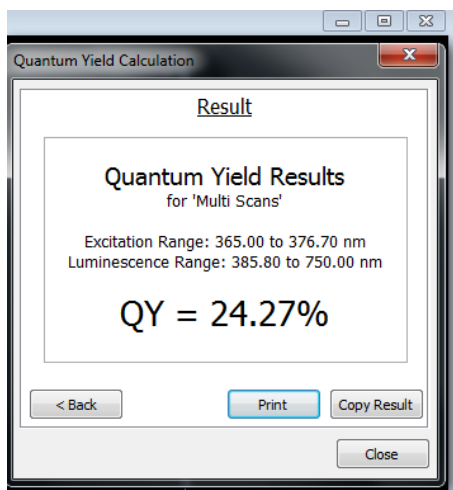

**Fig. S42.** The screenshot of the luminescence quantum yield of G1@Binbox in CH<sub>3</sub>OH measured with integration sphere.

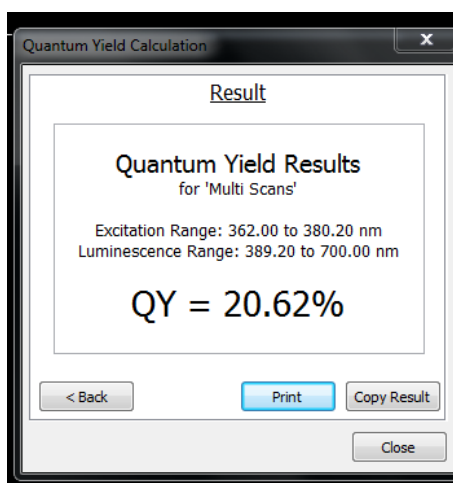

**Fig. S43.** The screenshot of the luminescence quantum yield of G2@Binbox in CH<sub>3</sub>OH measured with integration

sphere.

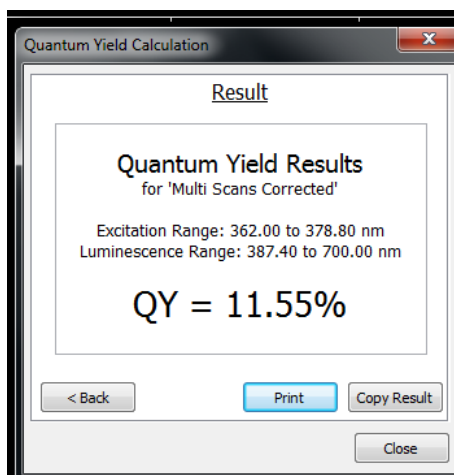

**Fig. S44.** The screenshot of the luminescence quantum yield of G3@Binbox in CH<sub>3</sub>OH measured with integration

sphere.

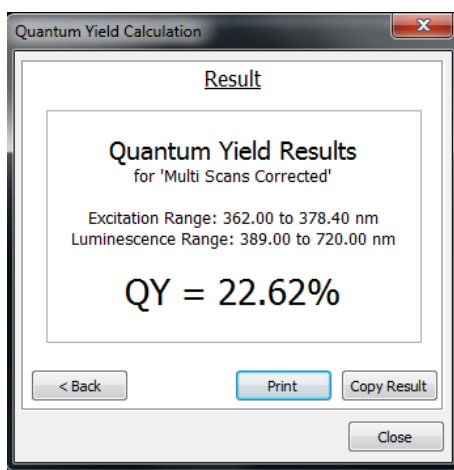

**Fig. S45.** The screenshot of the luminescence quantum yield of G4@Binbox in CH<sub>3</sub>OH measured with integration

sphere.

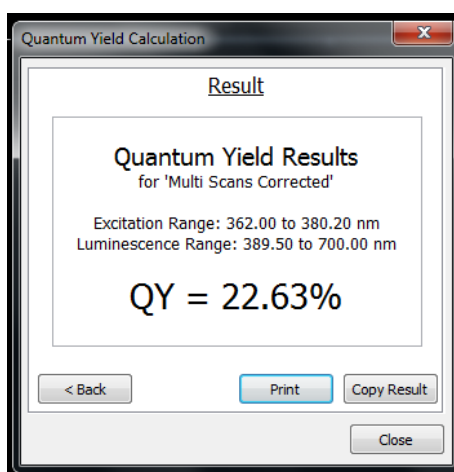

**Fig. S46.** The screenshot of the luminescence quantum yield of G5@Binbox in CH<sub>3</sub>OH measured with integration

sphere.

## 2.5 PL and CPL spectra of host-guest combination

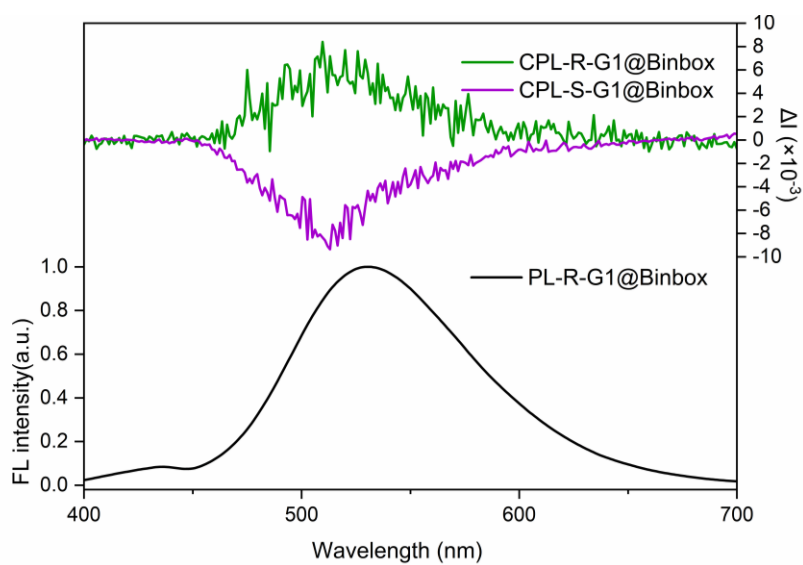

**Fig. S47.** PL and CPL spectra of the G1@Binbox ( $c = 1.0 \times 10^{-5}$  M).

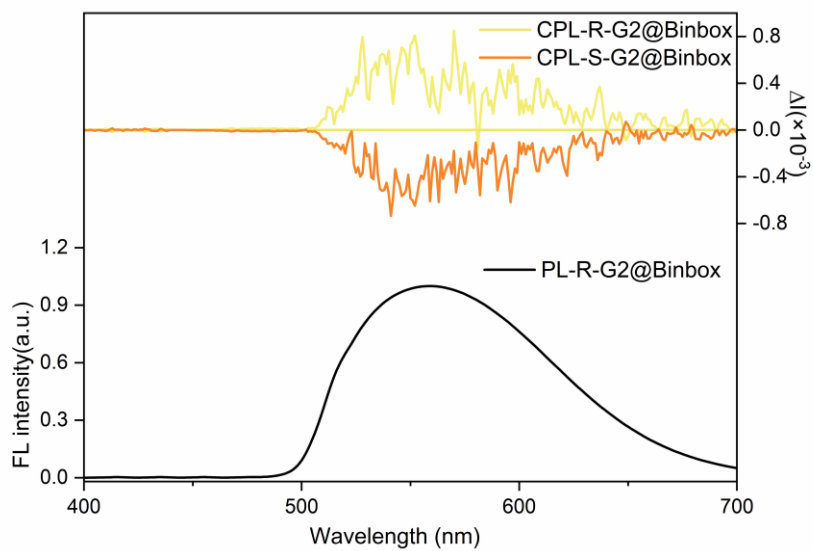

**Fig. S48.** PL and CPL spectra of the G2@Binbox ( $c = 1.0 \times 10^{-5}$  M).

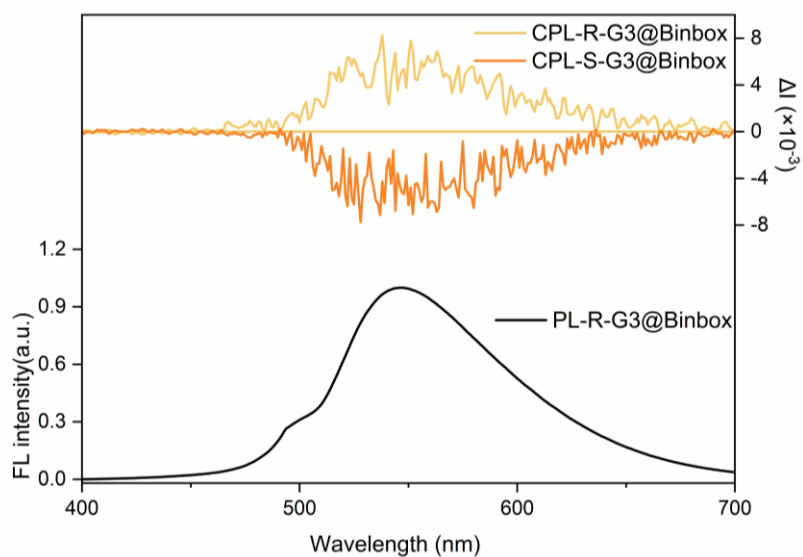

**Fig. S49.** PL and CPL spectra of the G3@Binbox ( $c = 1.0 \times 10^{-5}$  M).

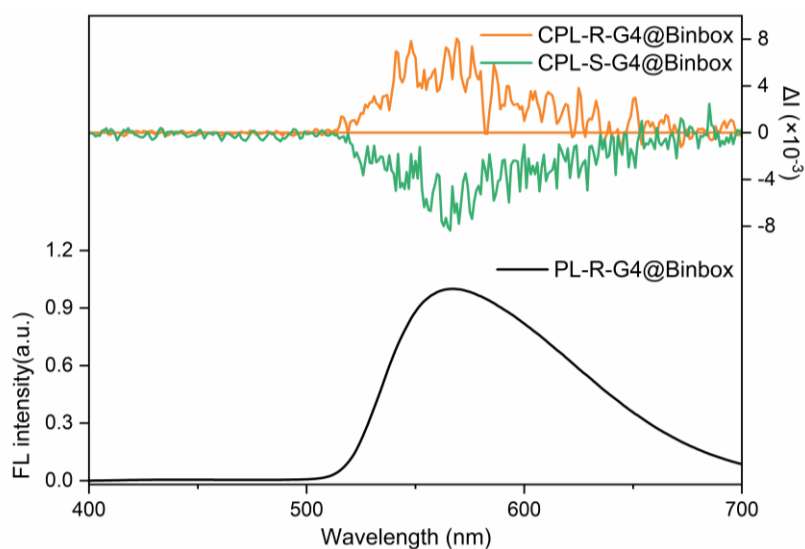

**Fig. S50.** PL and CPL spectra of the G4@Binbox ( $c = 1.0 \times 10^{-5}$  M).

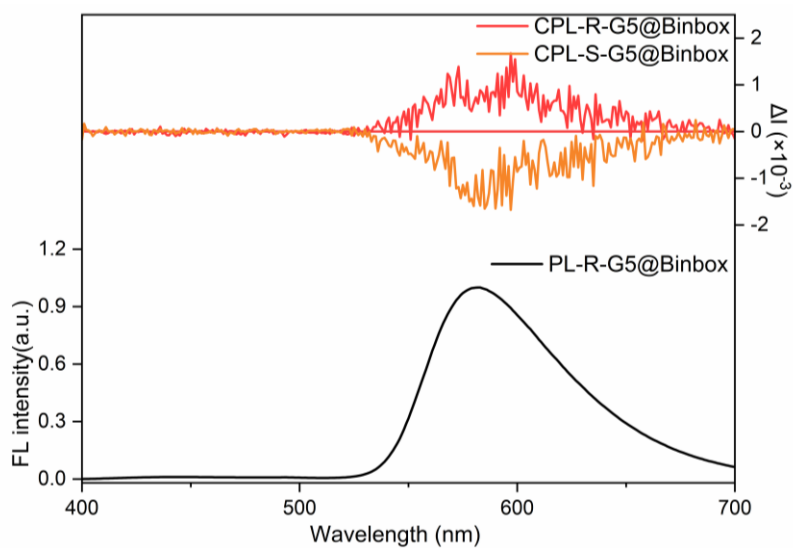

**Fig. S51.** PL and CPL spectra of the G5@Binbox ( $c = 1.0 \times 10^{-5}$  M).

### 3. Host-guest complexation studies

$^1\text{H}$  NMR titrations were conducted on a Bruker Avance III 400 MHz spectrometer and the chemical shifts are referenced internally to tetramethylsilane (TMS) or solvents in parts per million (ppm). In all cases,  $^1\text{H}$  NMR titrations were performed maintaining the concentration (usually around  $1.0 \times 10^{-2}$  M) of the host constant in  $\text{CD}_3\text{CN}$  or  $\text{CD}_3\text{OD}$ .

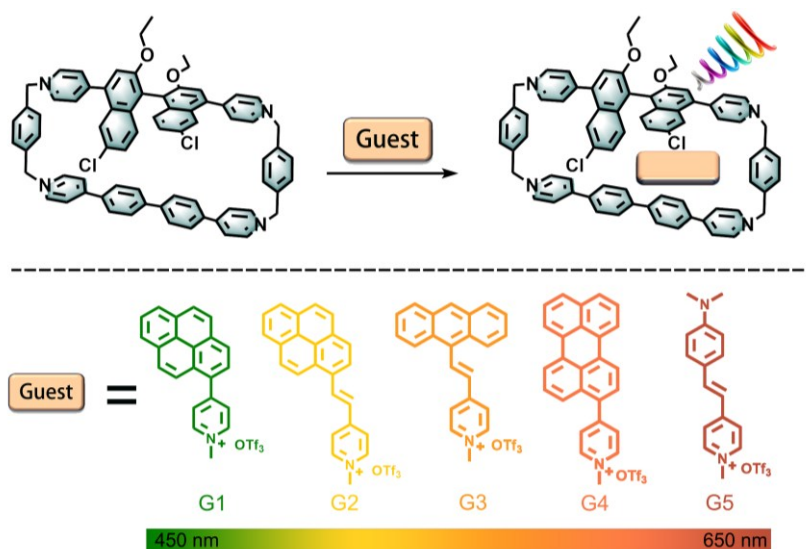

**Figure S52.** Binding constants of Binbox to accommodate various guests in either  $\text{CD}_3\text{CN}$  or  $\text{CD}_3\text{OD}$ .

Determined by  $^1\text{H}$  NMR titration.

Dissolve an achiral guest (100 equivalents, achiral planar fluorescent molecules) in  $\text{CD}_3\text{CN}$  or  $\text{CD}_3\text{OD}$  inside an NMR tube. Add varying equivalents of the achiral planar fluorescent molecules to the achiral  $\text{CD}_3\text{CN}$  or  $\text{CD}_3\text{OD}$  solution. Use a 10  $\mu\text{L}$  pipette for precise addition into the Binbox. Monitoring the chemical changes within the Binbox allows straightforward tracking of host-guest complex formation. The data were analysed with the Bindfit web-based app at [Supramolecular.org](http://Supramolecular.org) - Binding Constant Calculators Supramolecular.

**Table 1.** Binding constants ( $K_a$ ), fluorescence lifetimes ( $\tau$ ), Quantum efficiency (Yield), and induced  $g_{\text{lum}}$  values of Binbox and G1-G5@Binbox.

| Host/Guest | $K_a (10^2)$ | $\tau_1$ (ns) | $\tau_2$ (ns) | Yield (%) | $g_{\text{lum}} (10^{-3})$ |
|------------|--------------|---------------|---------------|-----------|----------------------------|
| Binbox     |              | 1.49          | 1.49          | 28.14     | 4.00                       |
| Binbox@G1  | 7.35         | 1.11          | 5.05          | 24.27     | 3.00                       |
| Binbox@G2  | 8.45         | 1.12          | 2.59          | 20.62     | 1.20                       |
| Binbox@G3  | 9.70         | 1.07          | 4.01          | 11.15     | 4.30                       |
| Binbox@G4  | 6.46         | 1.11          | 3.59          | 22.63     | 3.50                       |
| Binbox@G5  | 6.66         | 1.29          | 4.21          | 22.62     | 2.50                       |

### 3.1 G1@Binbox properties and exchange constants determination

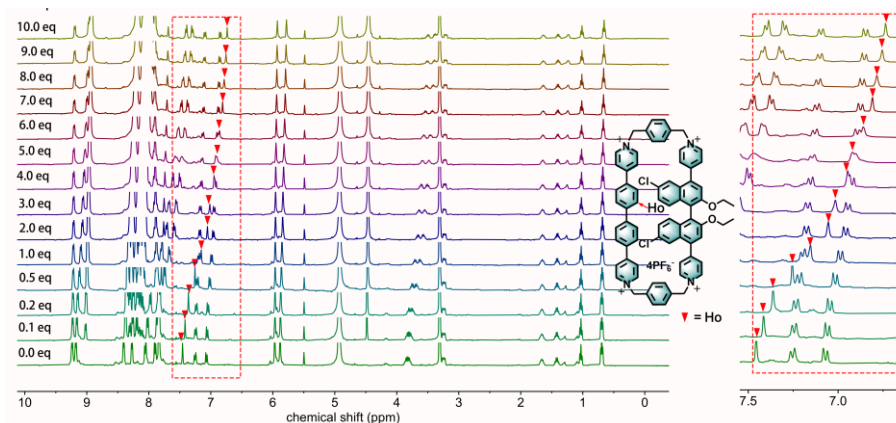

Figure S53.  $^1\text{H}$  NMR spectra of titration of G1@Binbox in  $\text{CD}_3\text{OD}$ .

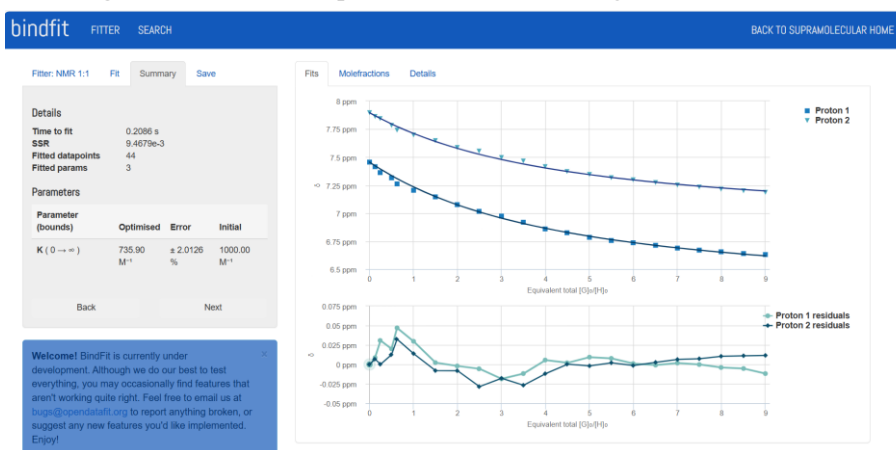

Figure S54. Screenshot from the result window of supramolecular.org which was fitted to 1:1  $^1\text{H}$  NMR binding data. This screenshot shows the raw vs. fitted data (top) and the corresponding residual plot.

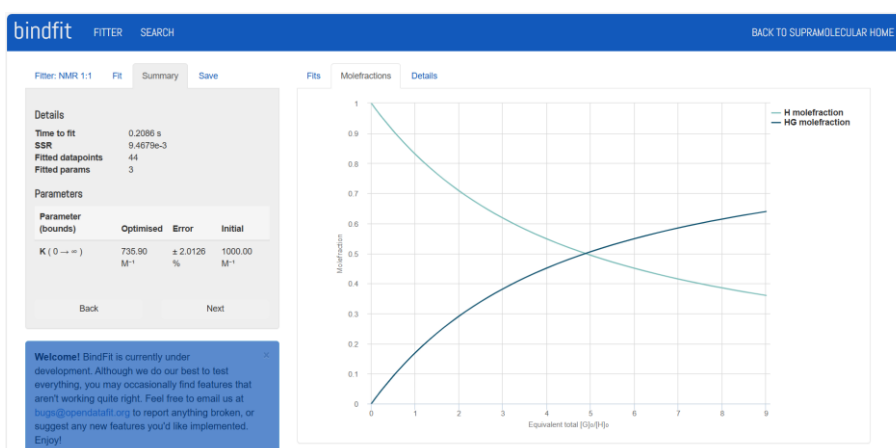

Figure S55. Screenshot from the result window of supramolecular.org which was fitted to 1:1  $^1\text{H}$  NMR binding data. This screenshot shows the calculated molefractions.

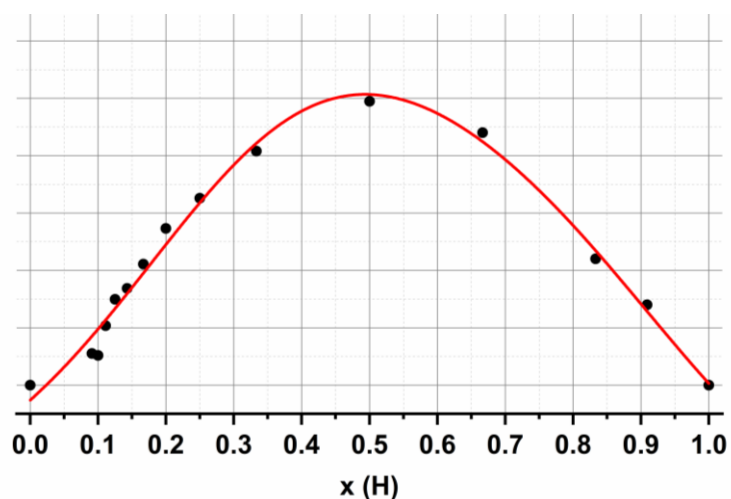

Figure S56. The job plots and residuals of G1@Binbox in CD<sub>3</sub>OD.

### 3.2 G2@Binbox properties and exchange constants determination

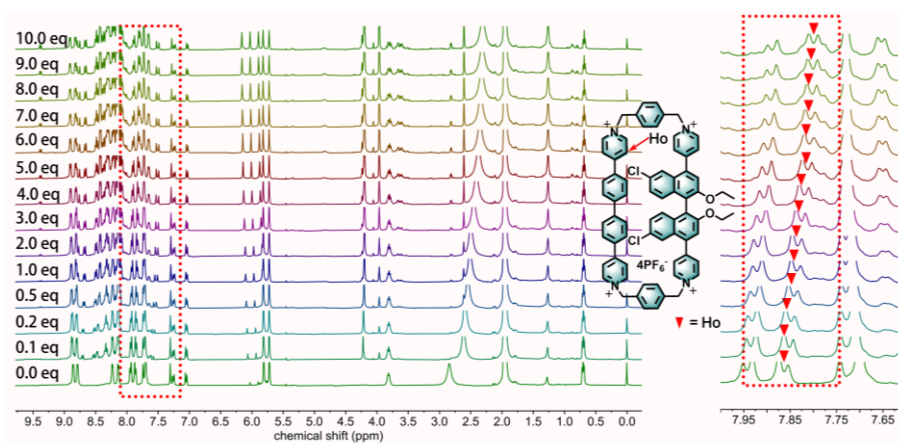

Figure S57. <sup>1</sup>H NMR spectra of titration of G2@Binbox in CD<sub>3</sub>OD.

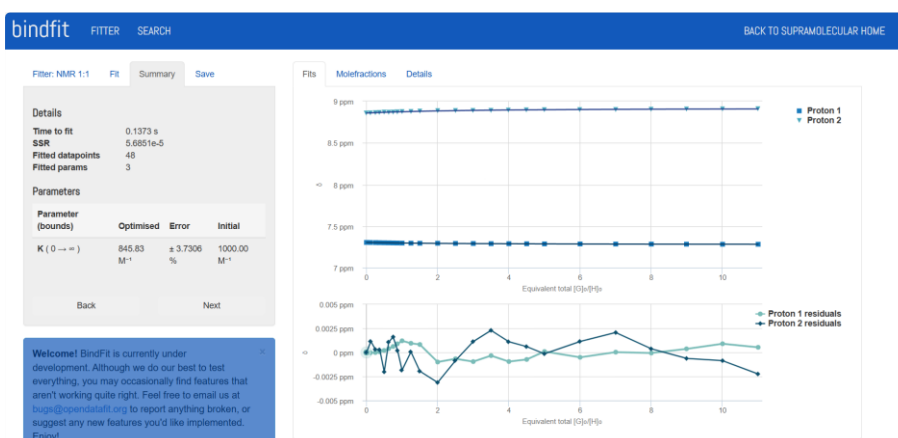

Figure S58. Screenshot from the result window of supramolecular.org which was fitted to 1:1 <sup>1</sup>H NMR binding data. This screenshot shows the raw vs. fitted data (top) and the corresponding residual plot.

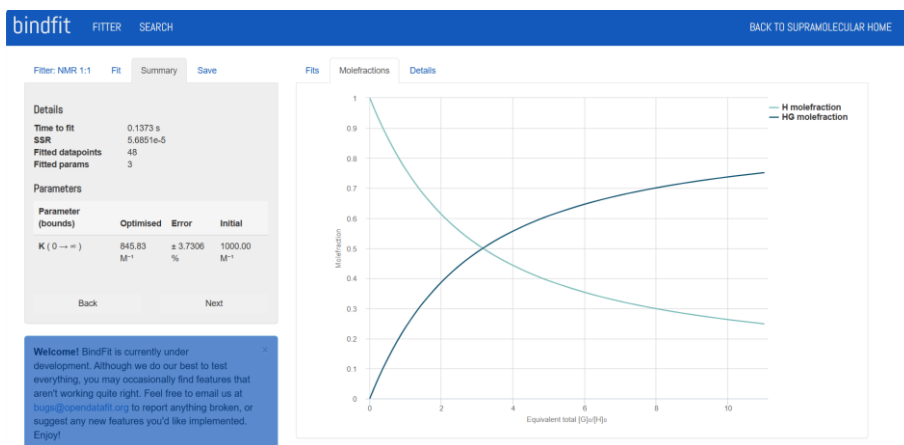

**Figure S59.** Screenshot from the result window of supramolecular.org which was fitted to 1:1 <sup>1</sup>H NMR binding data. This screenshot shows the calculated molefractions.

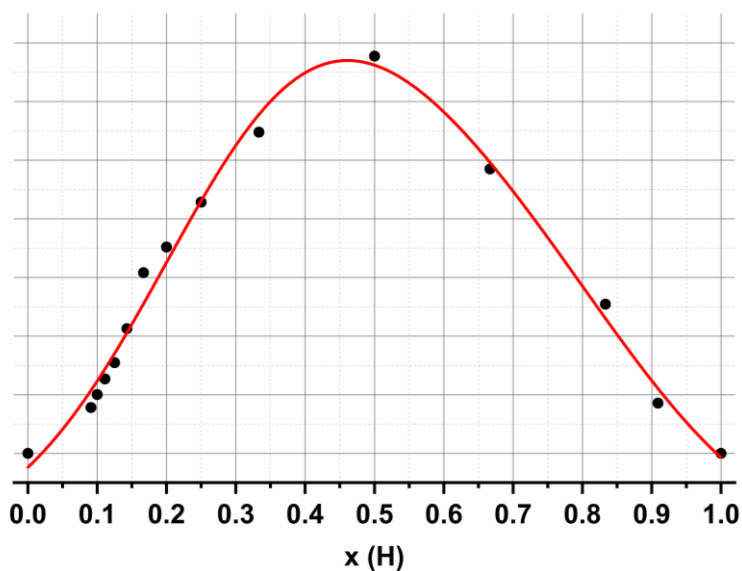

**Figure S53.** The job plots and residuals of G2@Binbox in CD<sub>3</sub>OD.

### 3.5 G3@Binbox properties and exchange constants determination

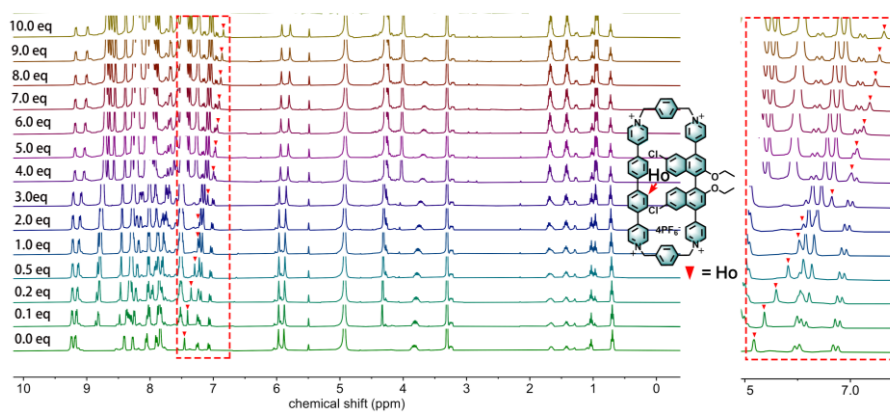

**Figure S60.** <sup>1</sup>H NMR spectra of titration of G3@Binbox in CD<sub>3</sub>OD.

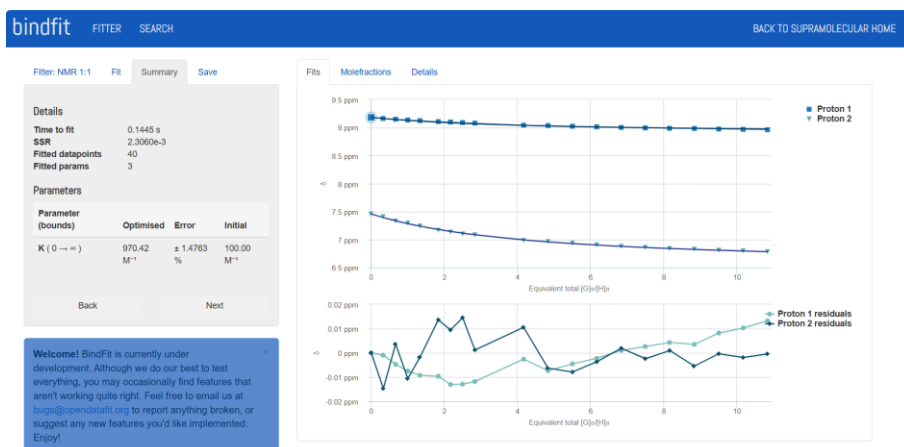

**Figure S61.** Screenshot from the result window of supramolecular.org which was fitted to 1:1 <sup>1</sup>H NMR binding data. This screenshot shows the raw vs. fitted data (top) and the corresponding residual plot.

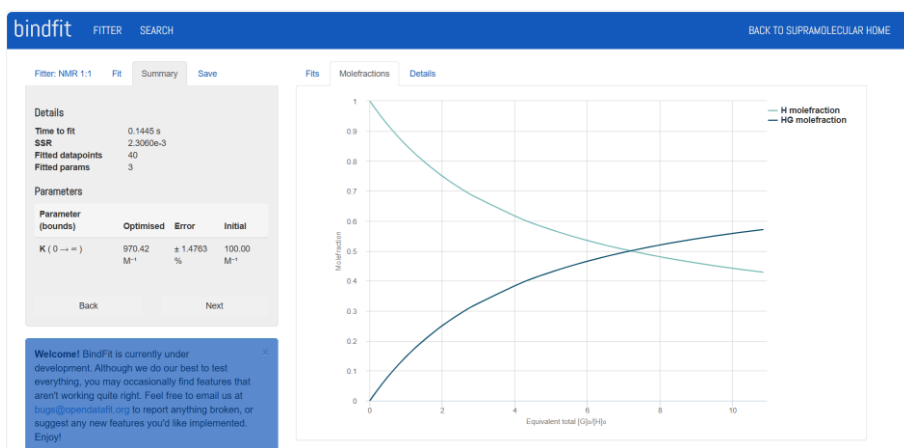

**Figure S62.** Screenshot from the result window of supramolecular.org which was fitted to 1:1 <sup>1</sup>H NMR binding data. This screenshot shows the calculated molefractions.

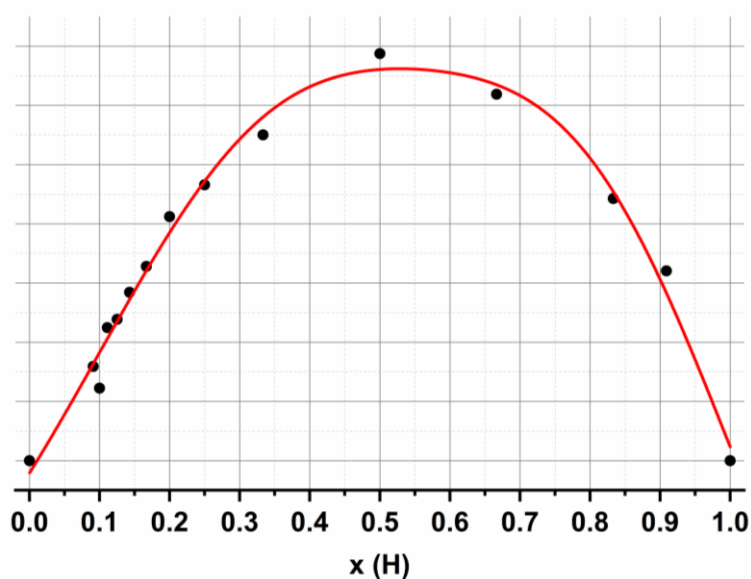

**Figure S63.** The job plots and residuals of G3@Binbox in CD<sub>3</sub>OD.

### 3.4 G4@Binbox properties and exchange constants determination

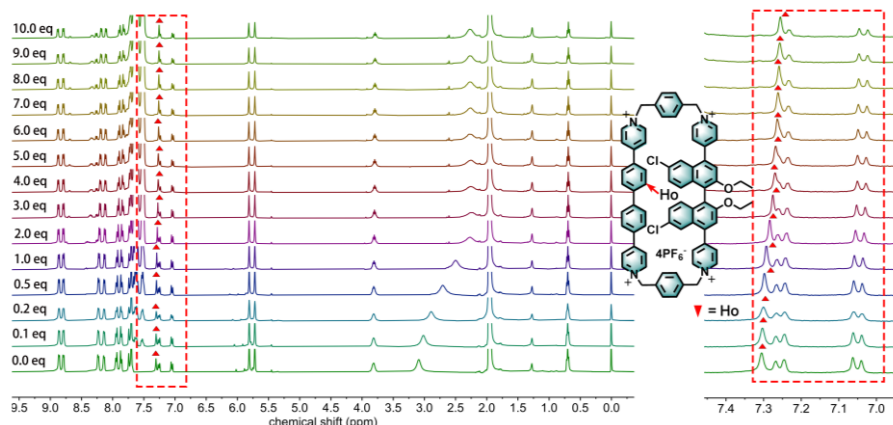

Figure S64.  $^1\text{H}$  NMR spectra of titration of G4@Binbox in  $\text{CD}_3\text{OD}$ .

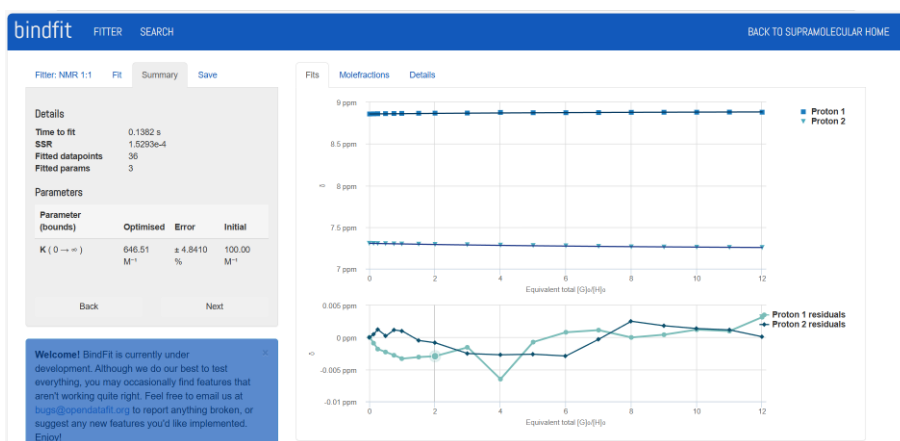

Figure S65. Screenshot from the result window of supramolecular.org which was fitted to 1:1  $^1\text{H}$  NMR binding data. This screenshot shows the raw vs. fitted data (top) and the corresponding residual plot.

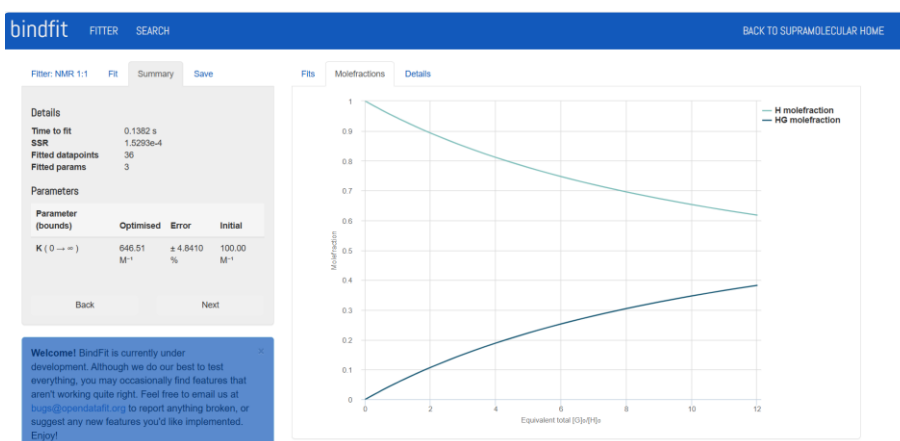

Figure S66. Screenshot from the result window of supramolecular.org which was fitted to 1:1  $^1\text{H}$  NMR binding data. This screenshot shows the calculated molefractions.

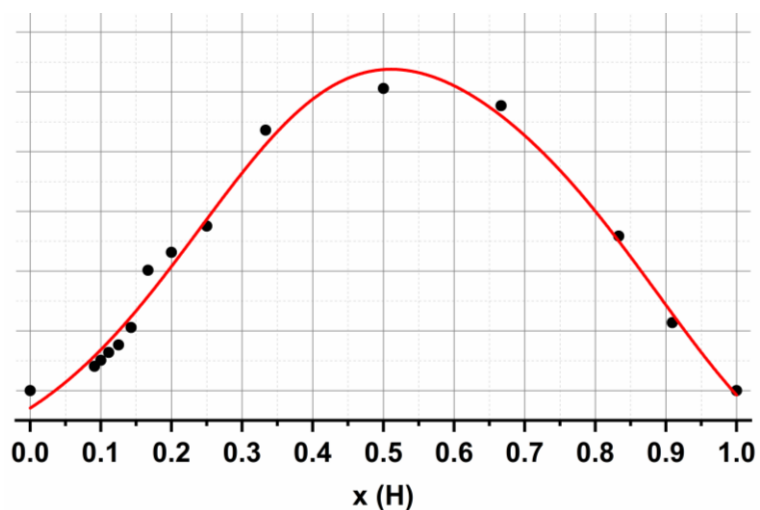

Figure S67. The job plots and residuals of G4@Binbox in CD<sub>3</sub>OD.

### 3.3 G5@Binbox properties and exchange constants determination

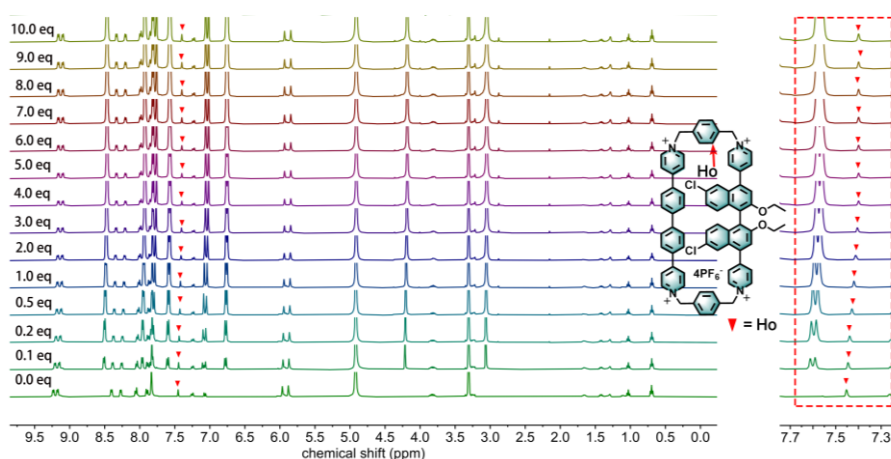

Figure S68. <sup>1</sup>H NMR spectra of titration of G5@Binbox in CD<sub>3</sub>OD.

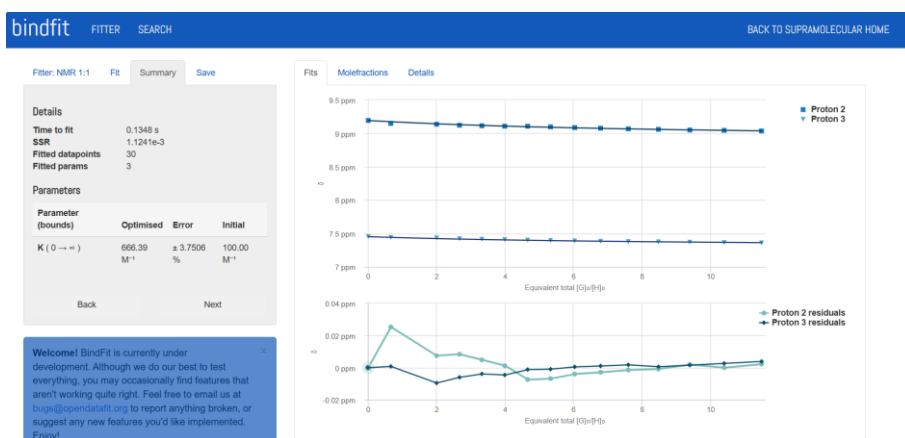

Figure S69. Screenshot from the result window of supramolecular.org which was fitted to 1:1 <sup>1</sup>H NMR binding data. This screenshot shows the raw vs. fitted data (top) and the corresponding residual plot.

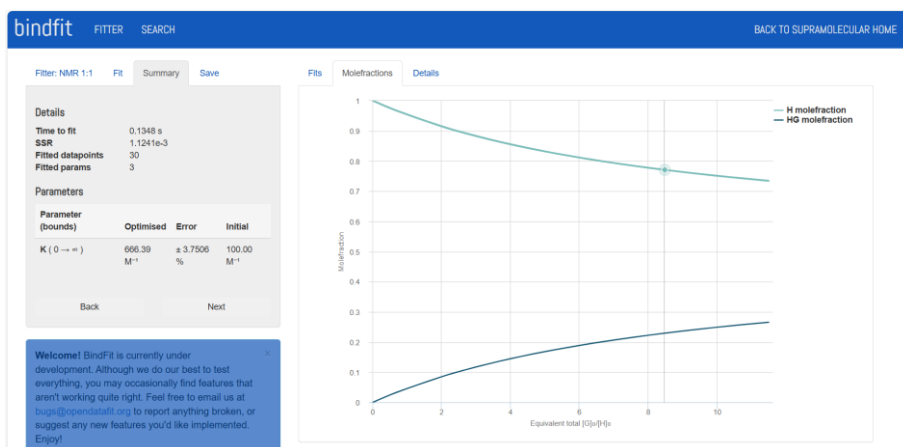

**Figure S70.** Screenshot from the result window of supramolecular.org which was fitted to 1:1 <sup>1</sup>H NMR binding data. This screenshot shows the calculated molefractions.

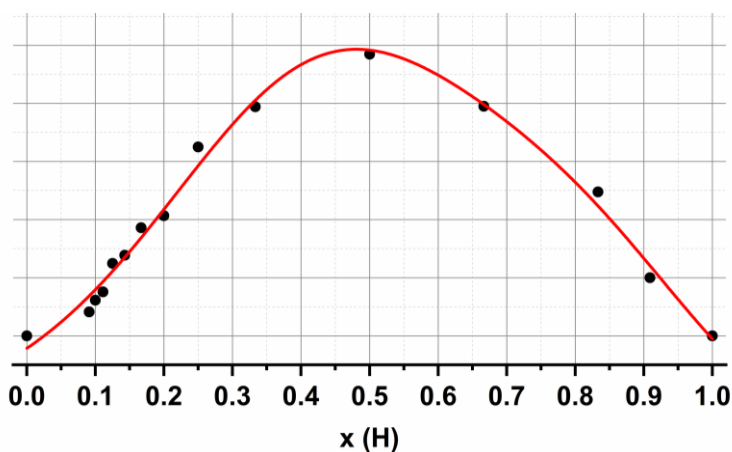

**Figure S71.** The job plots and residuals of G5@Binbox in CD<sub>3</sub>OD.

## 4. DFT and Hirshfeld

### 4.1 Calculation Details

All DFT calculations were performed using the Gaussian16 C.01 software package.<sup>[1]</sup> Geometry optimizations were carried out using DFT calculations with the b3lyp-D3 functional.<sup>[2]</sup> The 6-31G\* basis set was used for all atoms.<sup>[3-4]</sup> TD-DFT excited-state calculations of host-guest complexes were also performed using the Gaussian16 C.01 software package. During the calculations, the b3lyp/6-311G\* basis set was used.<sup>[5]</sup> The first 5 mono-electronic excitations were calculated and the transition dipole moment of ligand was visualized using Multiwfn and VMD.<sup>[6-7]</sup>

**The Geometry center and Fragment transition dipole moment are listed below.**

Electric dipole transition coordinate

Geometry center: 4.889585018157959 -0.7927072644233704 2.456634283065796

Fragment transition dipole moment: -0.15991099999999997 0.027513000000000003 -0.075571

Magnetic dipole transition coordinate

Geometry center: 4.889585018157959 -0.7927072644233704 2.456634283065796

Fragment transition dipole moment: 0.006125 -0.053389000000000006 -0.10585900000000001

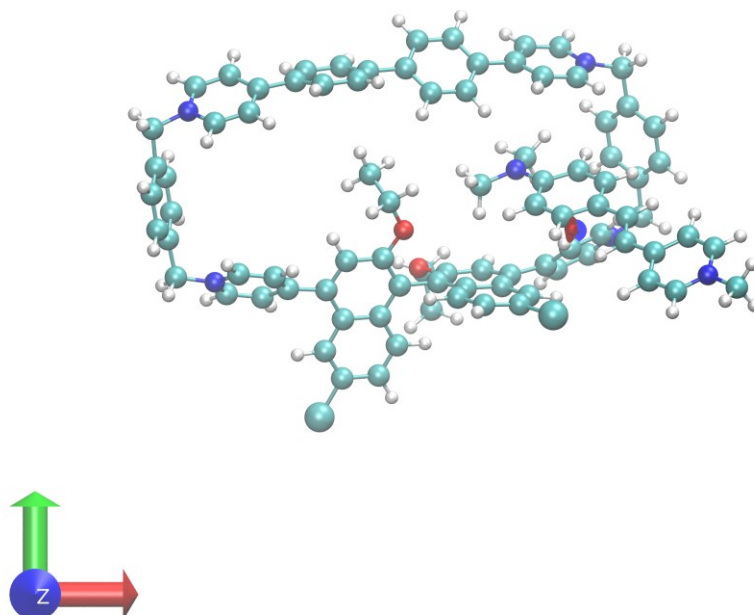

**Figure S72.** Magnetic dipole moments and electric dipole moment vectors of dye fragments in the host-guest system

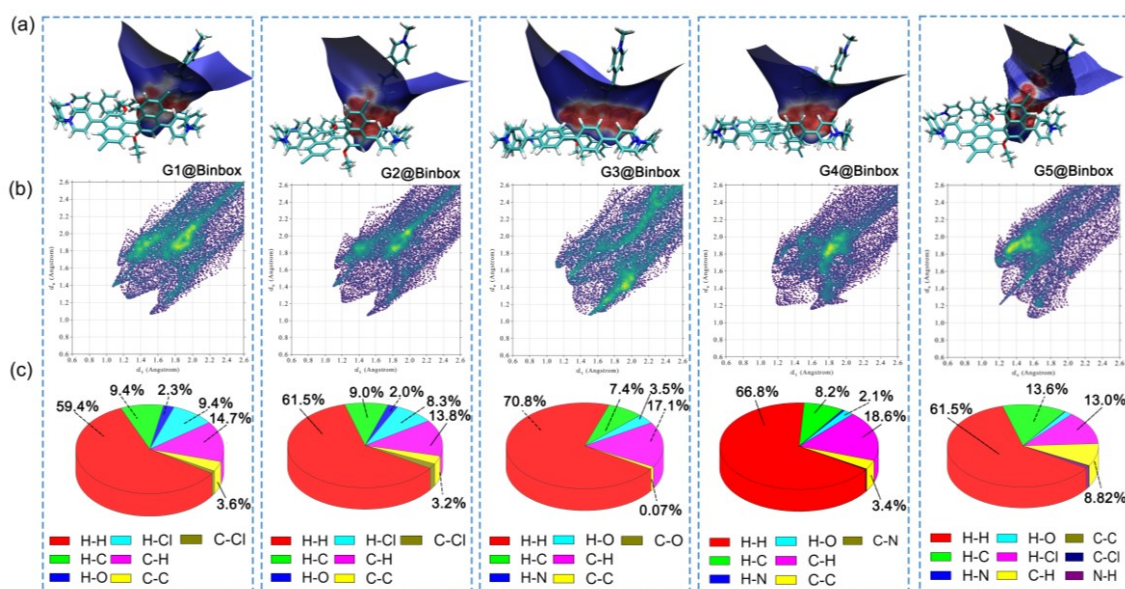

**Figure S73.** (a) Hirshfeld surfaces of G1-G5@Binbox (b) 2D fingerprint plots for G1-G5@Binbox. (c) Percentage contributions of the average interactions for G1-G5@Binbox.

## 5. Crystallographic Characterization

All crystallographic data are available free of charge from the Cambridge Crystallographic Data Centre (CCDC) via [www.ccdc.cam.ac.uk/data\\_request/cif](http://www.ccdc.cam.ac.uk/data_request/cif). CCDC number 2539057.

Method. BinBox (3.4 mg, 2.4  $\mu\text{mol}$ ) was dissolved in MeCN (0.8 mL) and the mixture was passed through a 0.45  $\mu\text{m}$  filter equally into three 1 mL tubes. The tubes were placed together in one 20 mL vial containing  $i\text{Pr}_2\text{O}$  (~3 mL) and the vial was capped. Slow vapor diffusion of  $i\text{Pr}_2\text{O}$  into the solution of BinBox in MeCN (3.0 mM) over the course of one week yielded colorless single crystals of BinBox. Data were collected at 100 K on a Bruker Kappa APEX<sub>2</sub> CCD Diffractometer equipped with a MoK $\alpha$  microsource with Quazar optics. The solid-state structure of BinBox is shown in Figure S1.

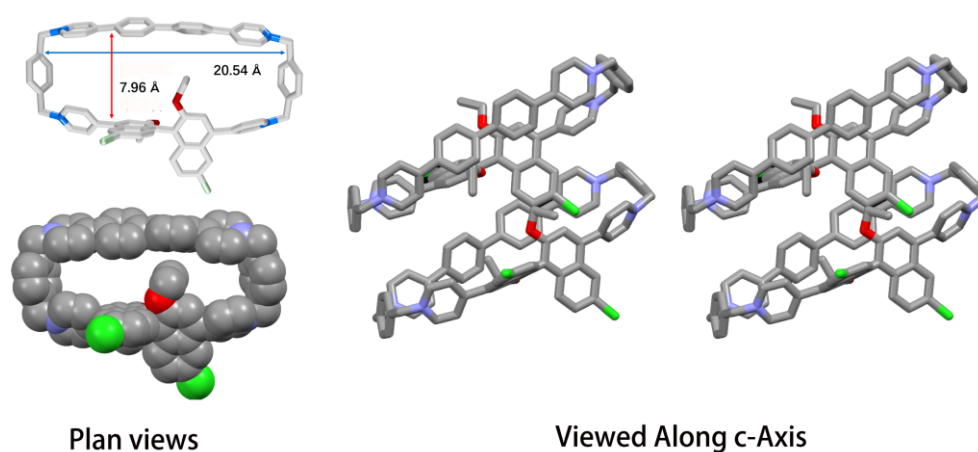

**Figure S74.** Different crystallographic views of BinBox. Counterions and solvent molecules are omitted for the sake of clarity.

**Table 2.** Crystal data of Binbox.

|                                    | Binbox                                                                                                       |
|------------------------------------|--------------------------------------------------------------------------------------------------------------|
| CCDC number                        | 2539057                                                                                                      |
| Empirical formula                  | C <sub>74</sub> H <sub>61</sub> Cl <sub>2</sub> F <sub>24</sub> N <sub>5</sub> O <sub>2</sub> P <sub>4</sub> |
| Formula weight                     | 1703.05                                                                                                      |
| Temperature/K                      | 193.0                                                                                                        |
| Crystal system                     | monoclinic                                                                                                   |
| Space group                        | P2 <sub>1</sub> 2 <sub>1</sub> 2 <sub>1</sub>                                                                |
| a/Å                                | 25.018(3)                                                                                                    |
| b/Å                                | 14.1085(15)                                                                                                  |
| c/Å                                | 43.383(5)                                                                                                    |
| α(deg)                             | 90                                                                                                           |
| β(deg)                             | 90.069(4)                                                                                                    |
| γ(deg)                             | 90                                                                                                           |
| Volume/Å <sup>3</sup>              | 15313(3)                                                                                                     |
| Z                                  | 8                                                                                                            |
| ρ <sub>calc</sub> /cm <sup>3</sup> | 1.477                                                                                                        |
| μ/mm <sup>-1</sup>                 | 0.276                                                                                                        |
| F(000)                             | 6928.0                                                                                                       |
| R1                                 | 0.1984,                                                                                                      |
| wR <sub>2</sub>                    | 0.3653                                                                                                       |
| R <sub>1</sub>                     | 0.2687                                                                                                       |
| wR <sub>2</sub>                    | 0.3994                                                                                                       |
| Goodness-of-fit on F <sup>2</sup>  | 1.134                                                                                                        |

## 2. References

- [1] DFT calculations were performed using Gaussian16, revision C.01; M. J. Frisch, G. W. Trucks, H. B. Schlegel, G. E. Scuseria, M. A. Robb, J. R. Cheeseman, G. Scalmani, V. Barone, G. A. Petersson, H. Nakatsuji, X. Li, M. Caricato, A. V. Marenich, J. Bloino, B. G. Janesko, R. Gomperts, B. Mennucci, H. P. Hratchian, J. V. Ortiz, A. F. Izmaylov, J. L. Sonnenberg, D. Williams-Young, F. Ding, F. Lipparini, F. Egidi, J. Goings, B. Peng, A. Petrone, T. Henderson, D. Ranasinghe, V. G. Zakrzewski, J. Gao, N. Rega, G. Zheng, W. Liang, M. Hada, M. Ehara, K. Toyota, R. Fukuda, J. Hasegawa, M. Ishida, T. Nakajima, Y. Honda, O. Kitao, H. Nakai, T. Vreven, K. Throssell, J. A. Montgomery, Jr., J. E. Peralta, F. Ogliaro, M. J. Bearpark, J. J. Heyd, E. N. Brothers, K. N. Kudin, V. N. Staroverov, T. A. Keith, R. Kobayashi, J. Normand, K. Raghavachari, A. P. Rendell, J. C. Burant, S. S. Iyengar, J. Tomasi, M. Cossi, J. M. Millam, M. Klene, C. Adamo, R. Cammi, J. W. Ochterski, R. L. Martin, K. Morokuma, O. Farkas, J. B. Foresman and D. J. Fox, Gaussian, Inc.: Wallingford CT, 2016.
- [2] Grimme, S.; Ehrlich, S.; Goerigk, L. Effect of the damping function in dispersion corrected density functional theory. *J. Comput. Chem.* **2011**, *32*, 1456–1465.
- [3] M. Dolg, U. Wedig, H. Stoll and H. Preuss, Energyadjusted ab initio pseudopotentials for the first row transition elements, *J. Chem. Phys.*, 1987, **86**, 866–872.
- [4] J. M. L. Martin and A. Sundermann, Correlation consistent valence basis sets for use with the Stuttgart-Dresden-Bonn relativistic effective core potentials: The atoms Ga–Kr and In–Xe, *J. Chem. Phys.*, 2001, **114**, 3408–3420.
- [5] R. Bauernschmitt and R. Ahlrichs, Treatment of electronic excitations within the adiabatic approximation of time dependent density functional theory. *Chem. Phys. Lett.*, *256*, 454–464.
- [6] T. Lu, F. Chen, Multiwfn: a multifunctional wavefunction analyzer, *J. Comput. Chem.*, 2012, **33**, 580–592.
- [7] W. Humphrey, A. Dalke and K. Schulten, VMD: visual molecular dynamics, *J. Mol. Graphics.*, 1996, **14**, 33–38
- Bauernschmitt, R., & Ahlrichs, R. (1996). Treatment of electronic excitations within the adiabatic approximation of time dependent density functional theory. *Chemical Physics Letters*, *256*, 454–464.
